# Supplementary material
Source: Royal Society of Chemistry journal article supplement (doi:10.1039/d6cp00879h)

# 15N SABRE PulsePol Analysis

(a)

Coherent PulsePol

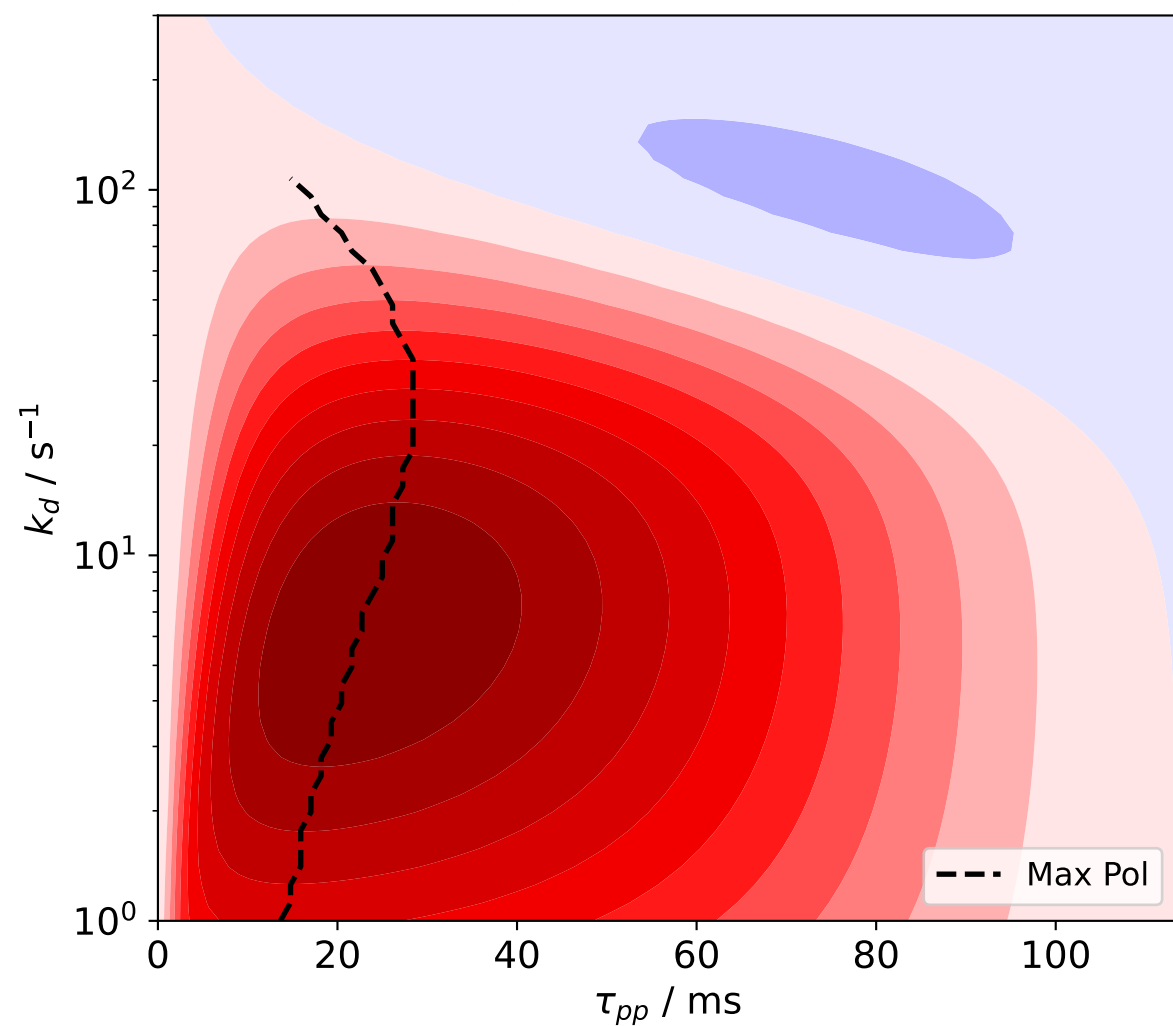

(b)

Optimized PulsePol ( $\phi > 0$ )

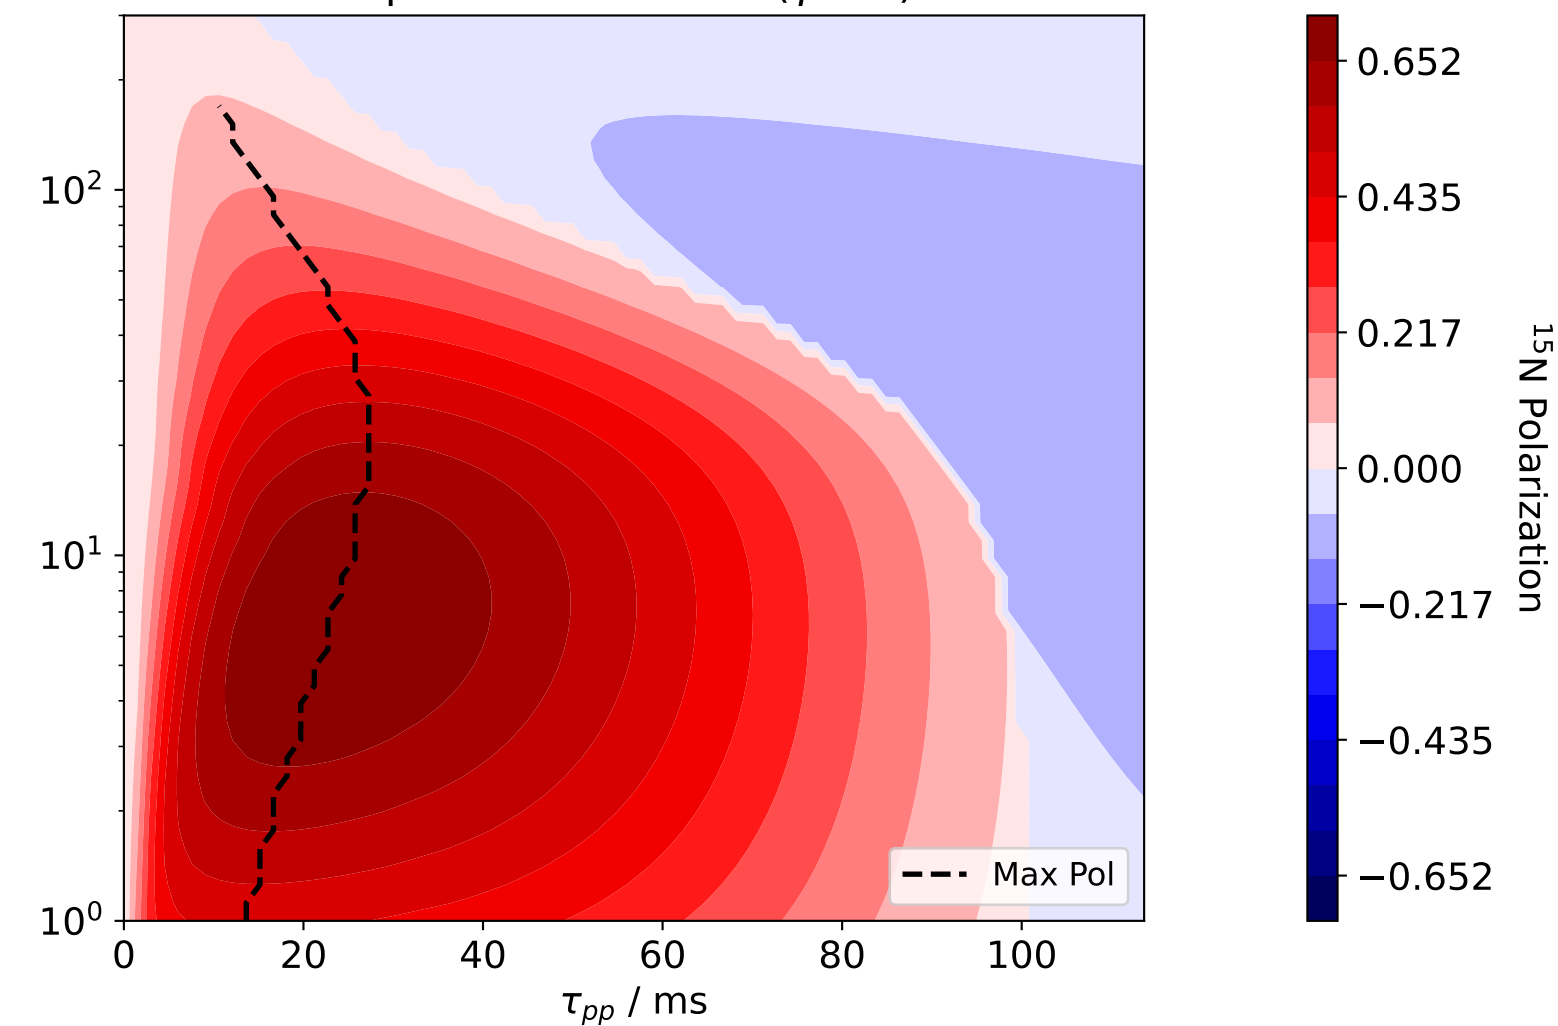

(c)

Difference ( $|\text{Optim}| - |\text{Coherent}|$ )

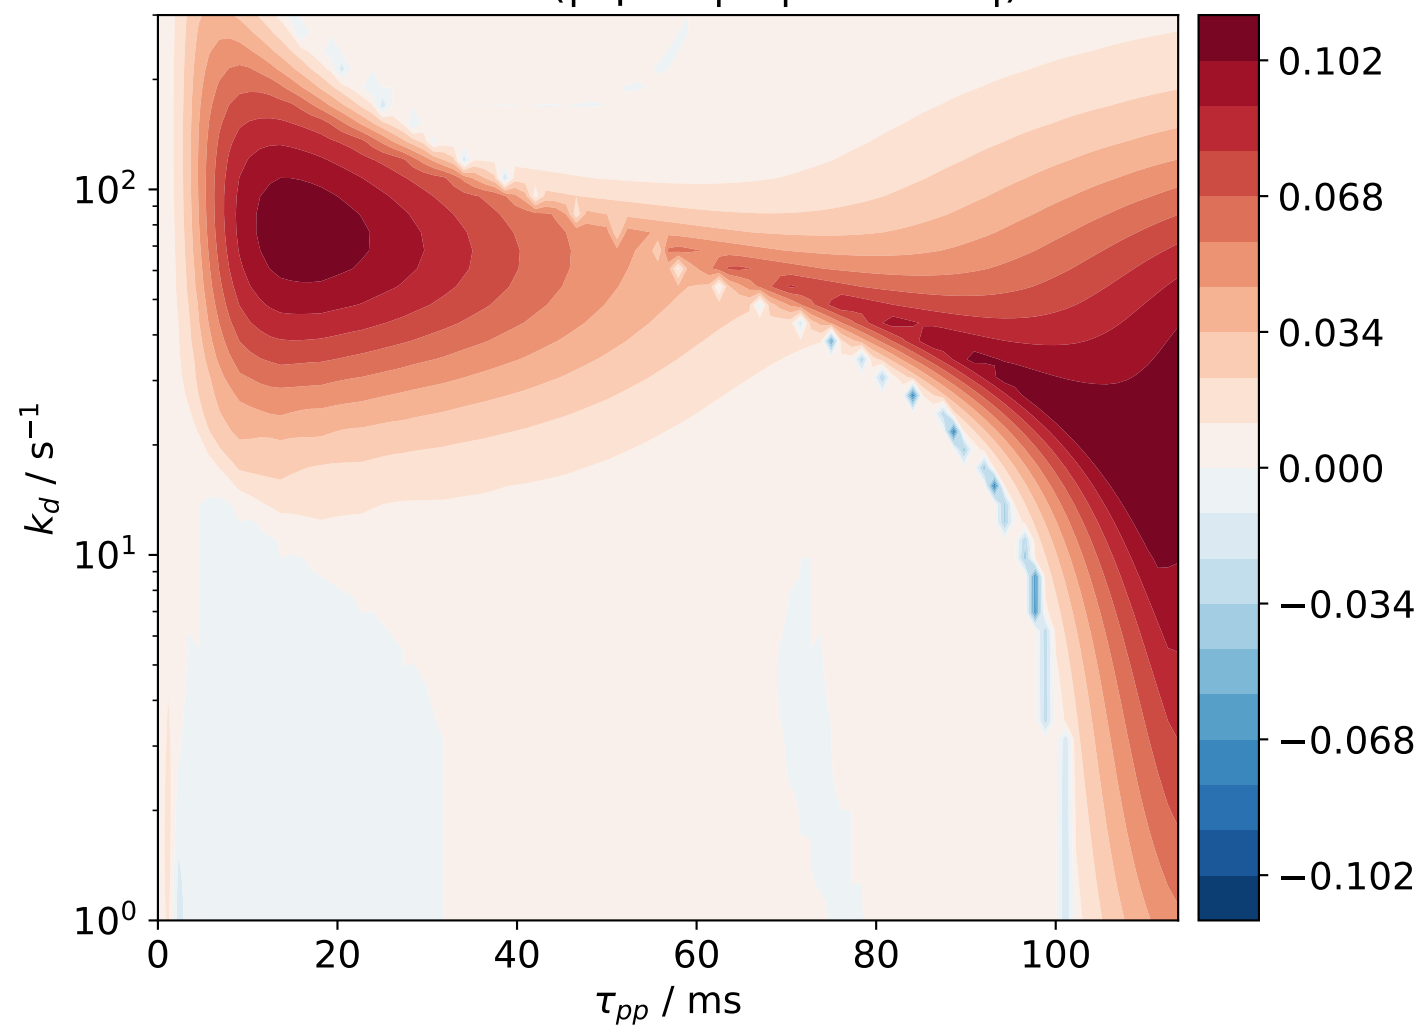

(d)

Scaling & Phase Comparison

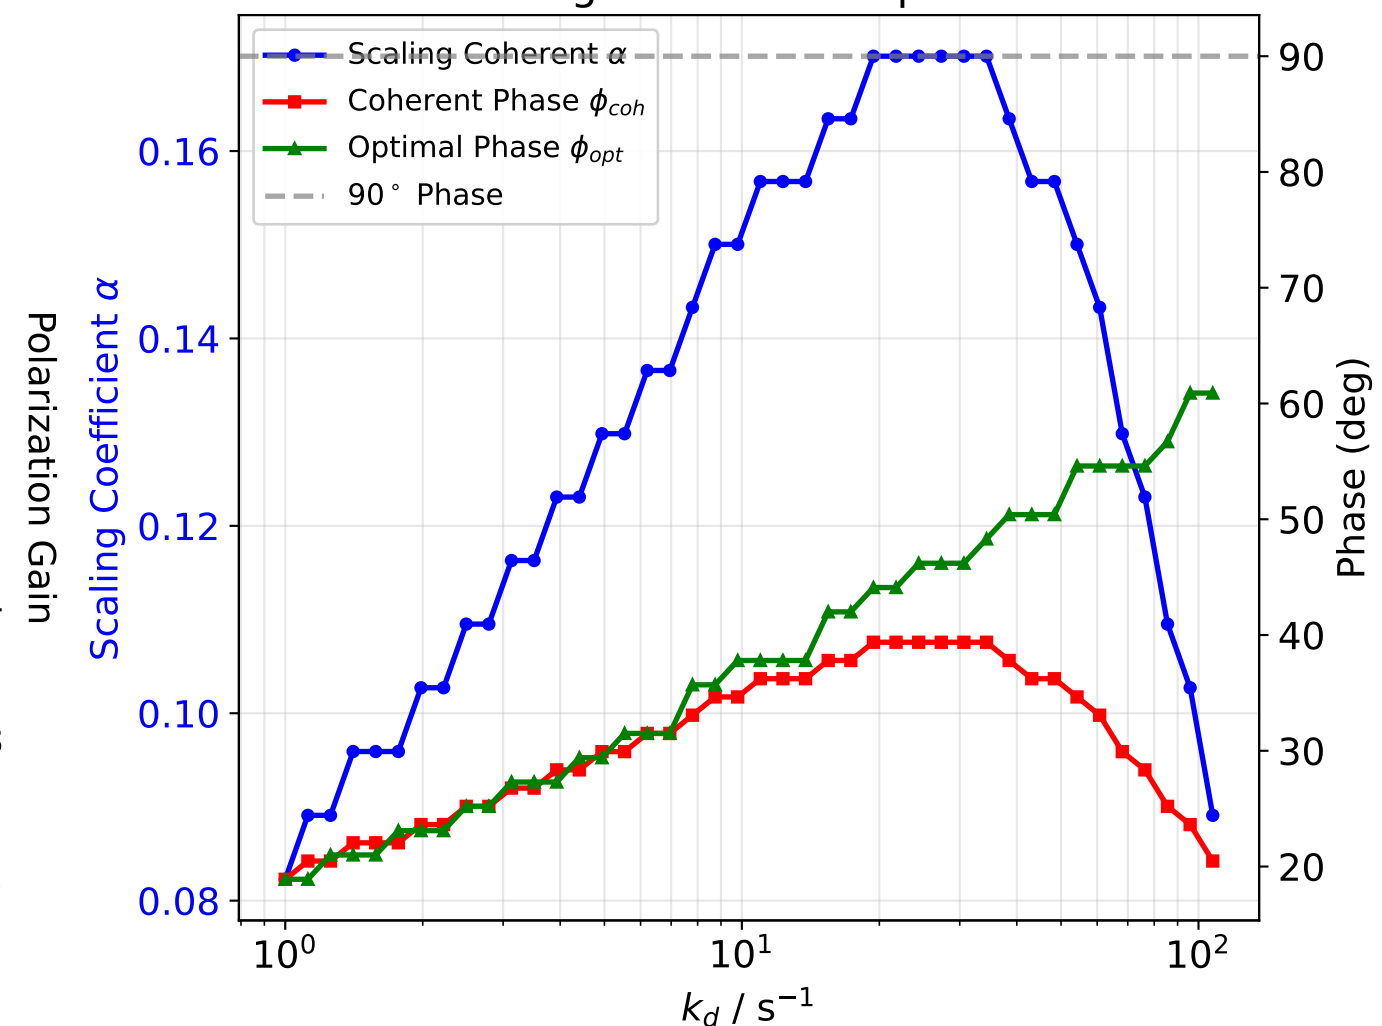

Supplement: d6cp00879h2.zip [file SABRE_PP_Final_2x2_Complete_LegendLeft.pdf › SI_figures/SABRE_PP_Final_2x2_Complete_LegendLeft.pdf]
