# Supplementary material
Source: Royal Society of Chemistry journal article supplement (doi:10.1039/d6cp00879h)

# 15N SABRE PulsePol Analysis

Coherent PulsePol

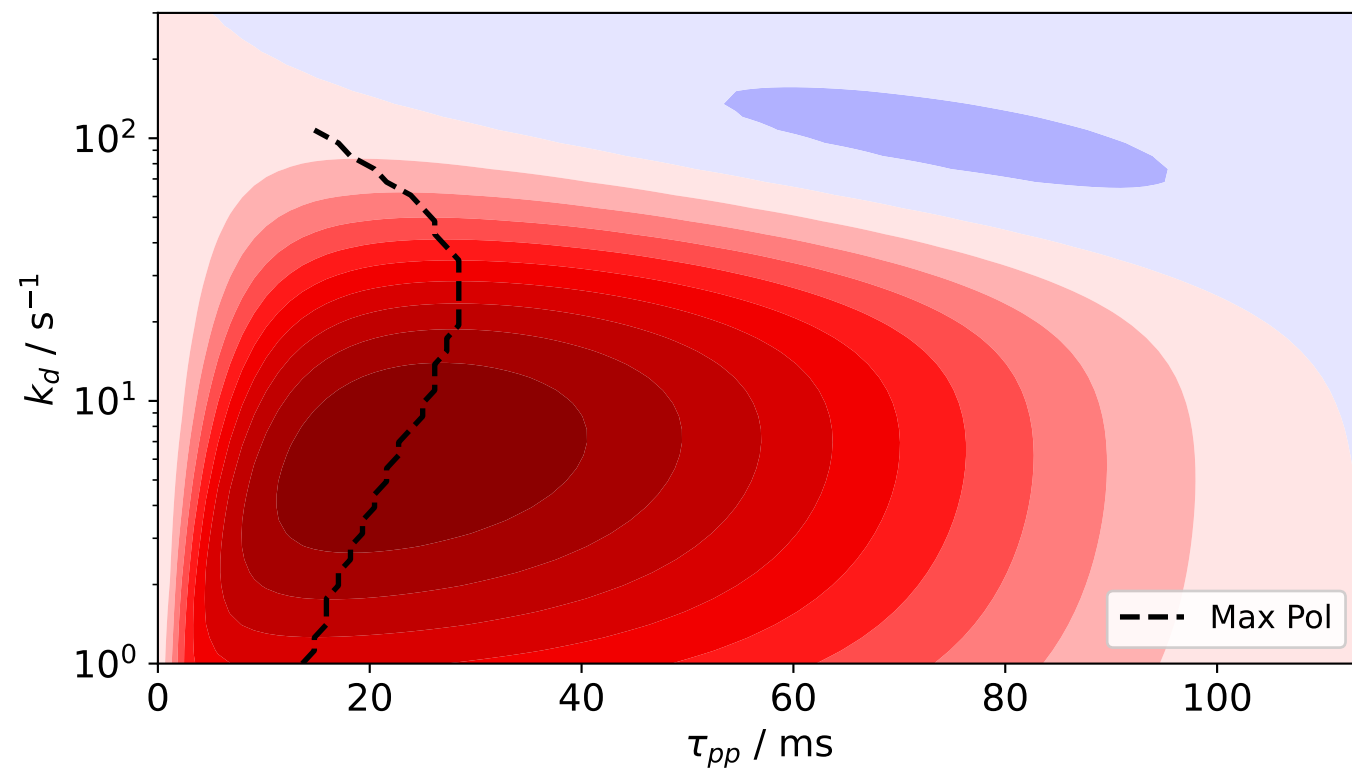

Optimized PulsePol ( $\phi > 0$ )

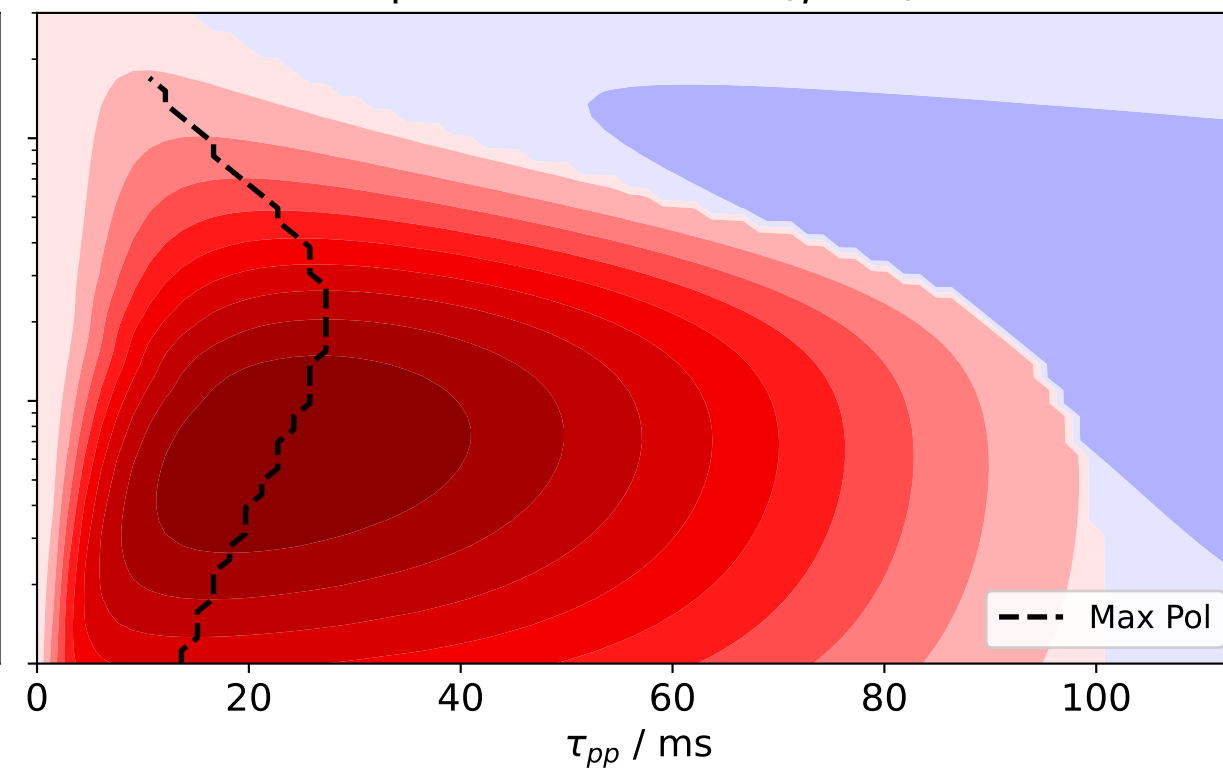

Difference ( $|\text{Optim}| - |\text{Coherent}|$ )

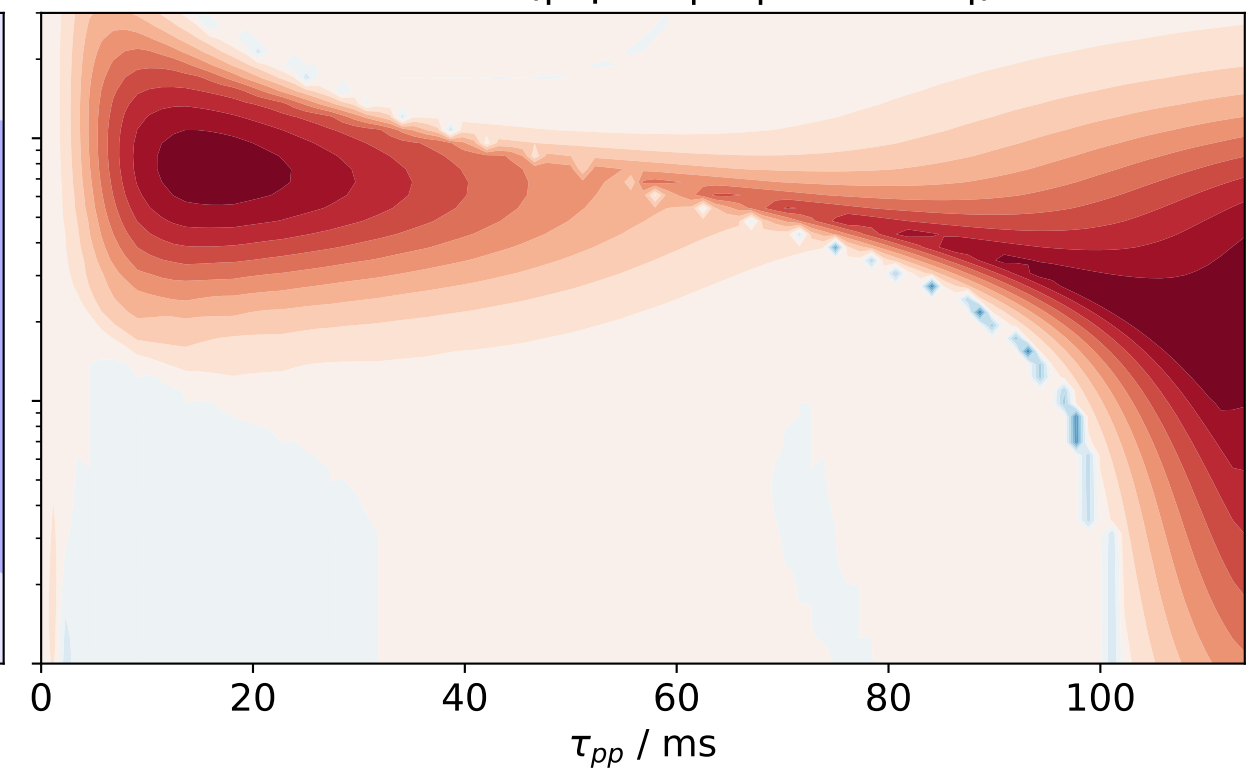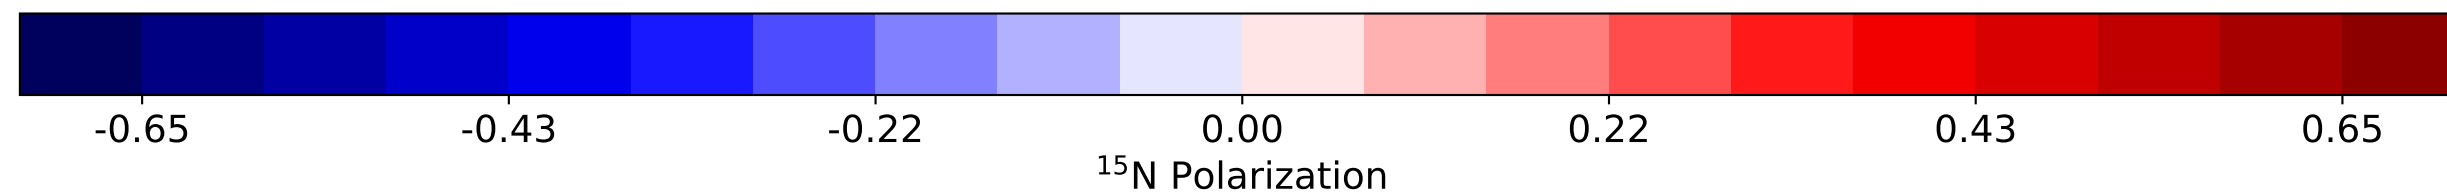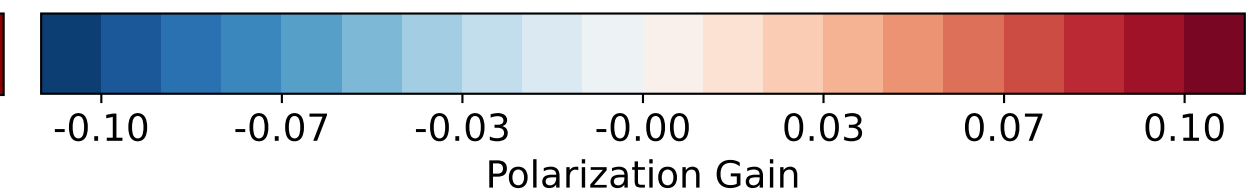

Supplement: d6cp00879h2.zip [file SABRE_PP_Final_IndependentLines.pdf › SI_figures/SABRE_PP_Final_IndependentLines.pdf]
