# Supplementary material
Source: Royal Society of Chemistry journal article supplement (doi:10.1039/d6cp00879h)

# <sup>15</sup>N SABRE-SLIC Analysis

(a) Standard SLIC (Offset = 0 Hz)

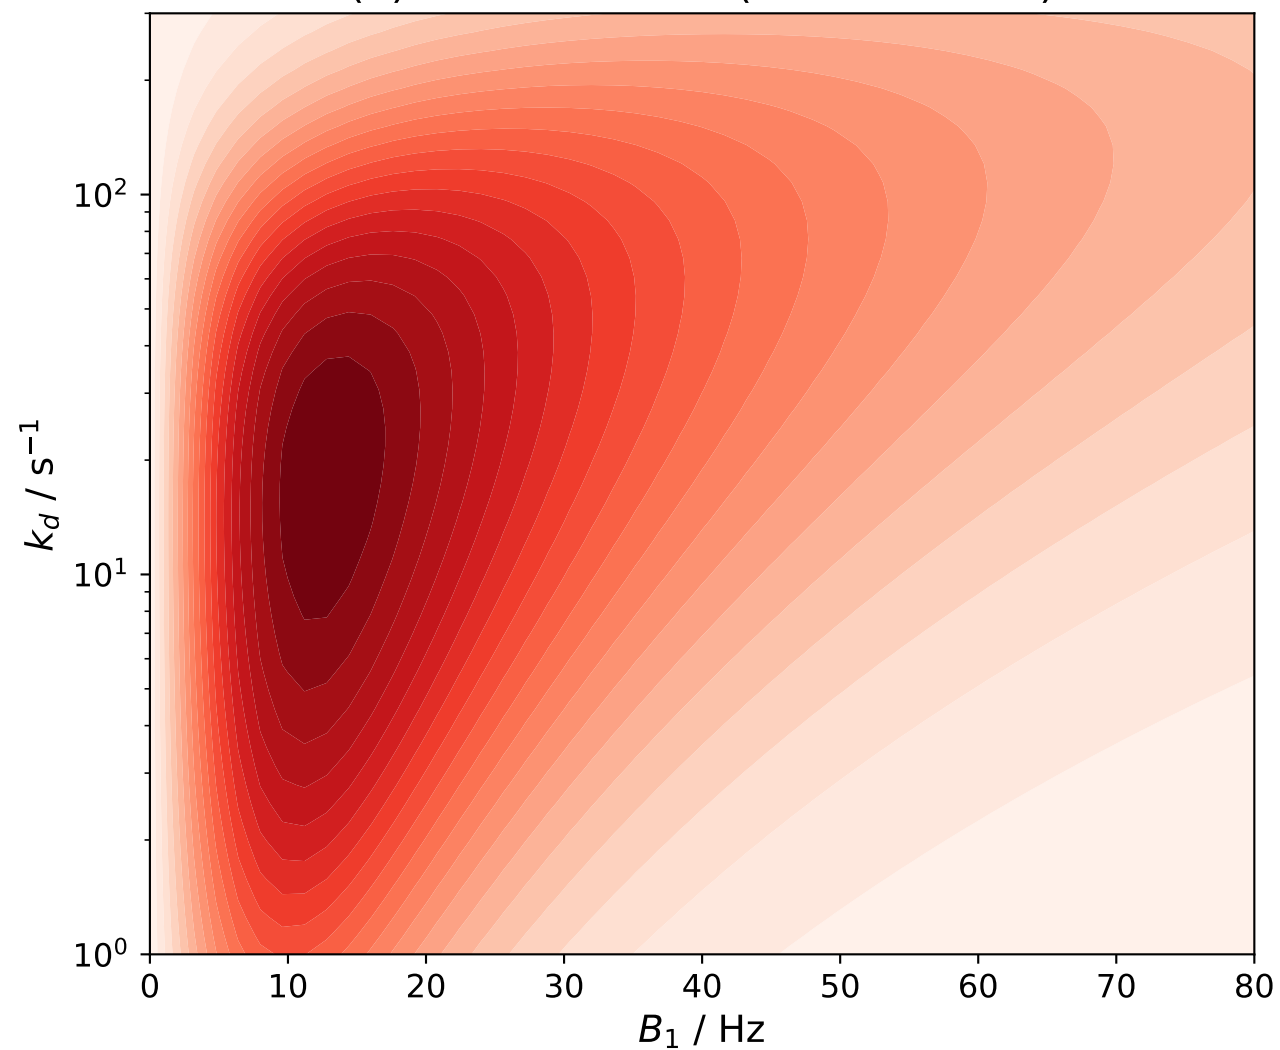

(b) Optimized Offset (Max Pol)

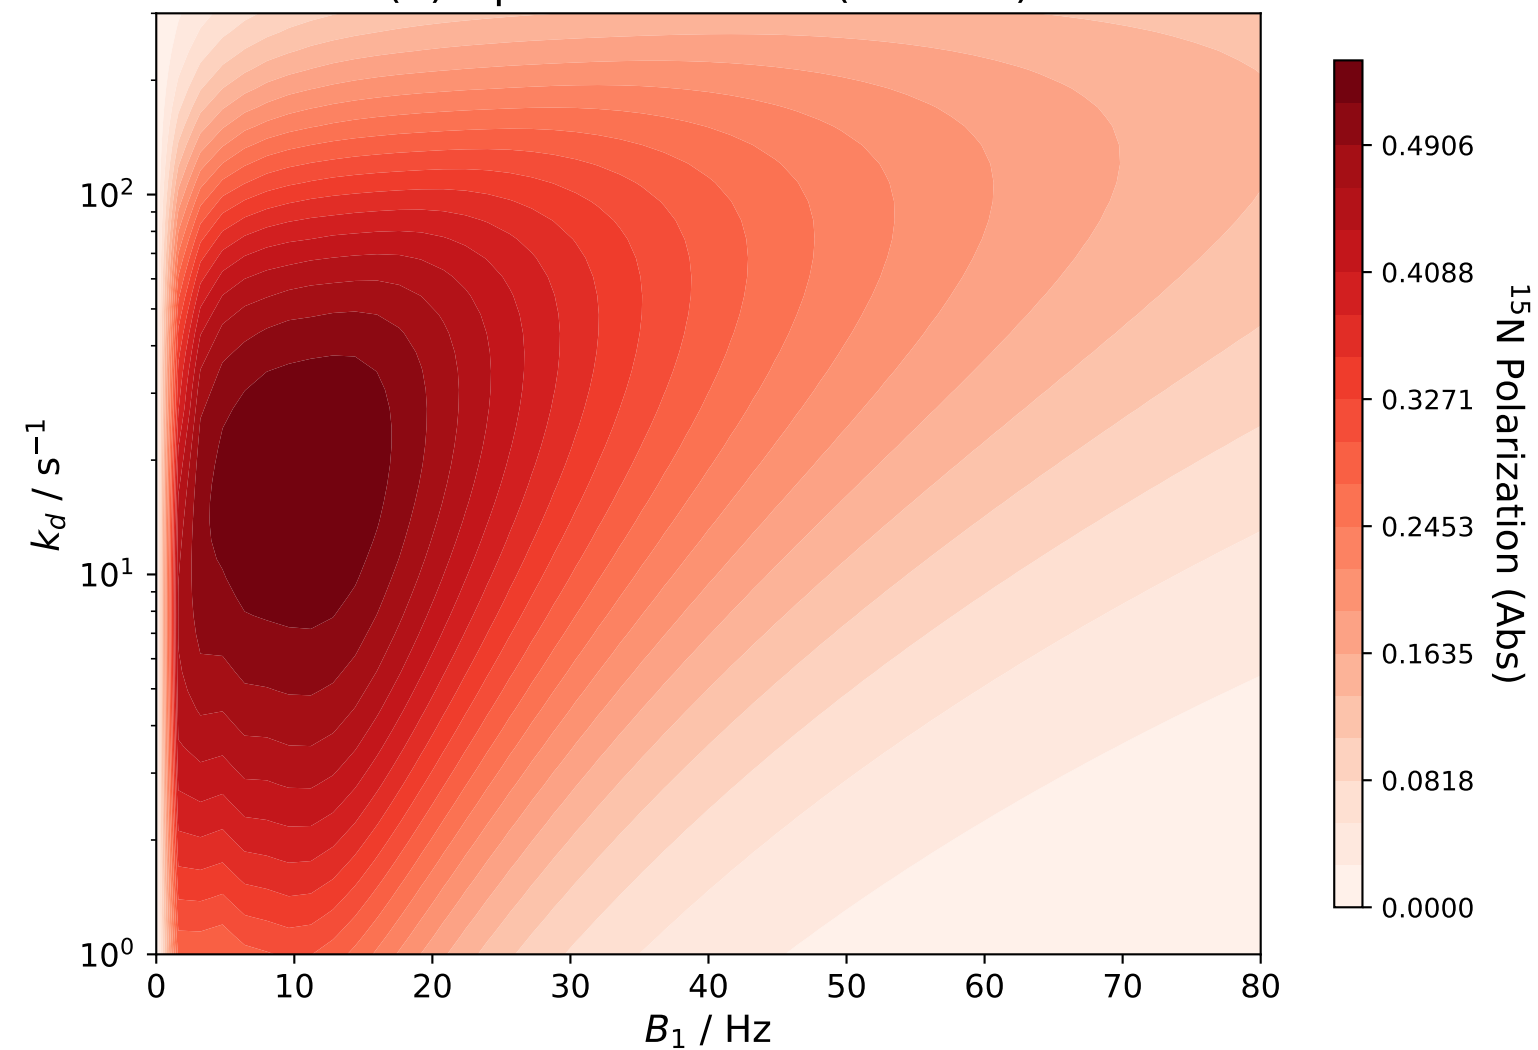

(c) Gain from Offset ( $P_{opt} - P_0$ )

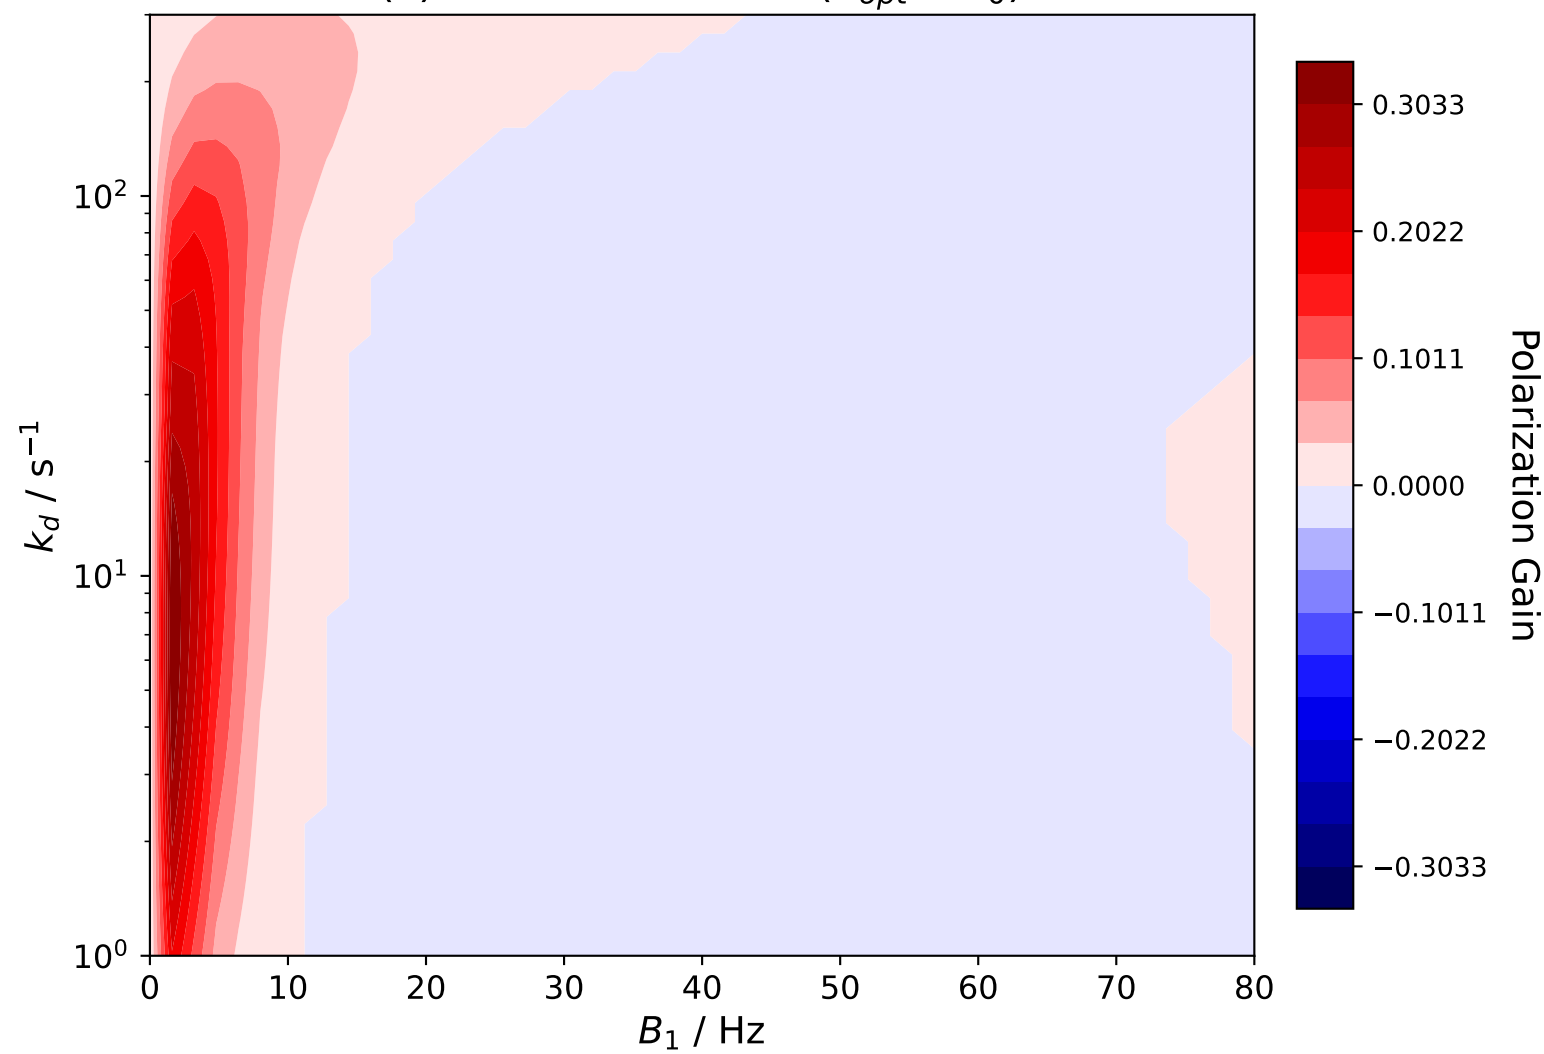

(d) Global Max Polarization vs.  $k_d$

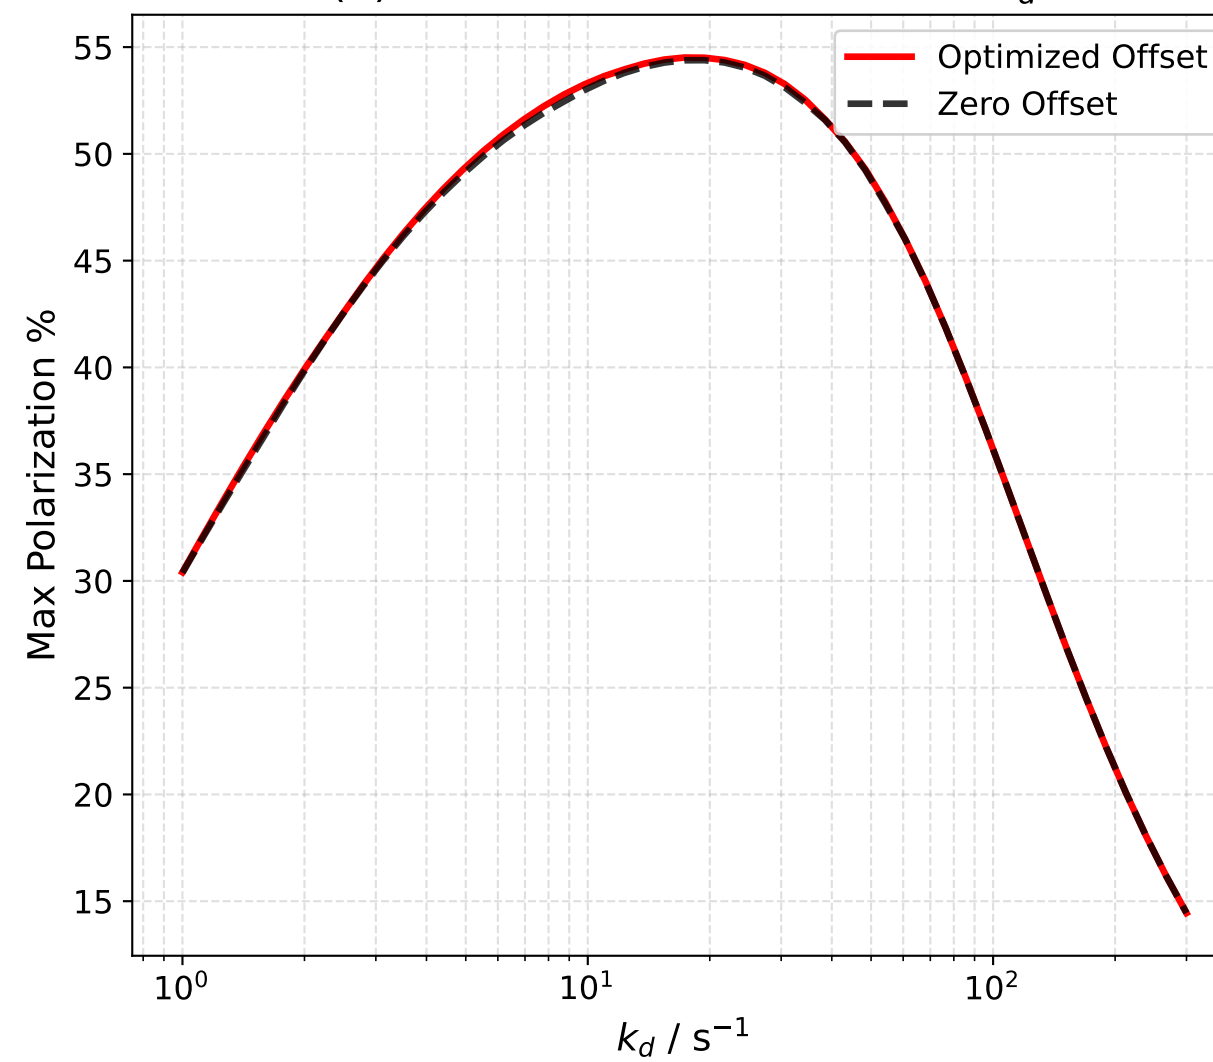

Supplement: d6cp00879h2.zip [file SLIC_Offset_Analysis_2x2_Final.pdf › SI_figures/SLIC_Offset_Analysis_2x2_Final.pdf]
