# Supplementary material
Source: Royal Society of Chemistry journal article supplement (doi:10.1039/d6cp00879h)

Maximum Theoretical SABRE Efficiency vs. Exchange Rate

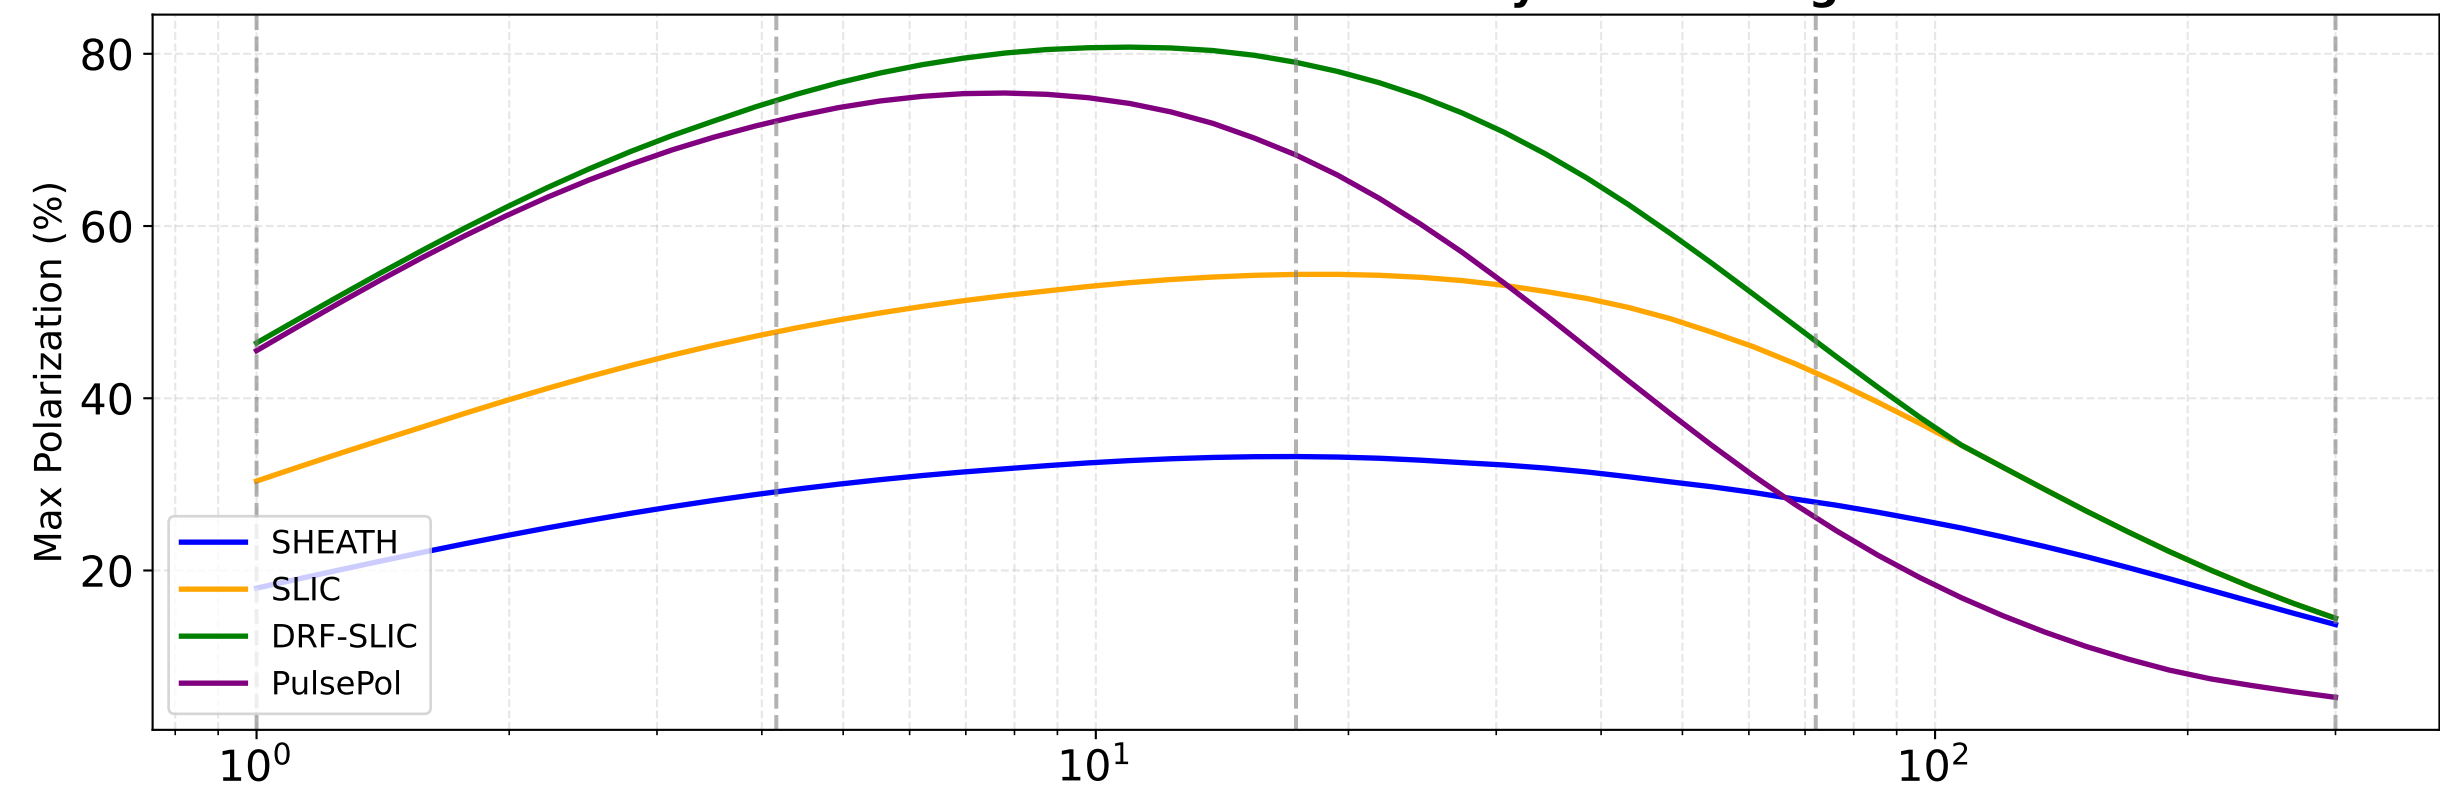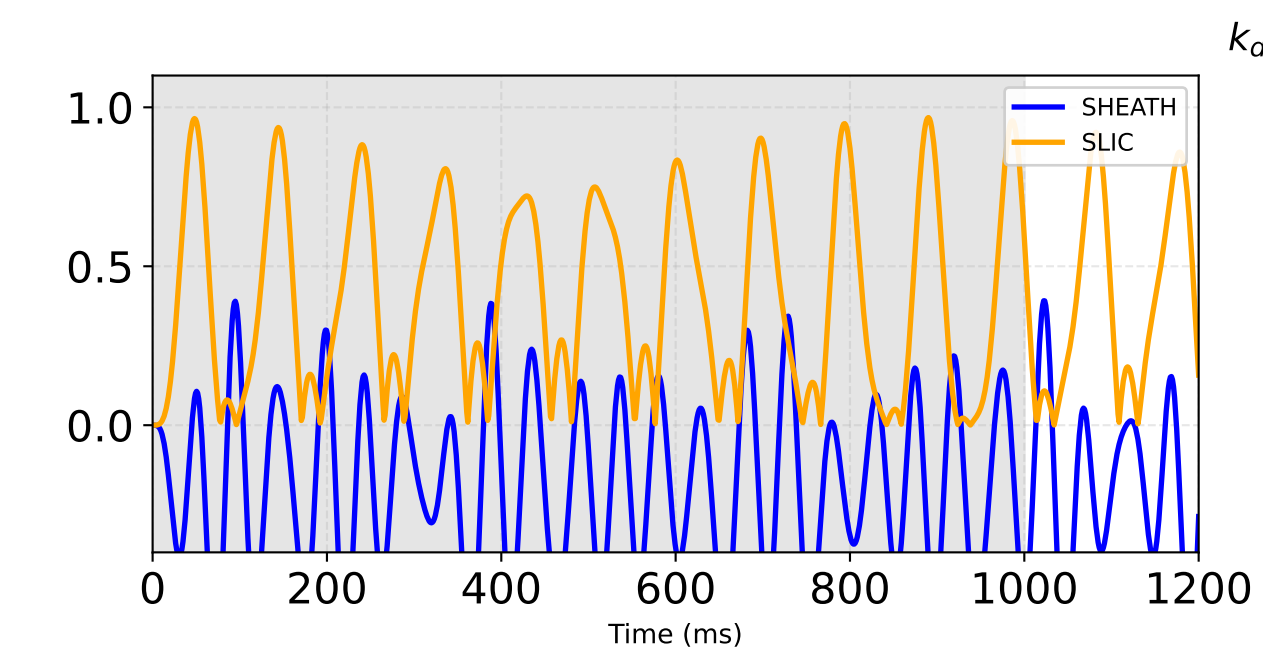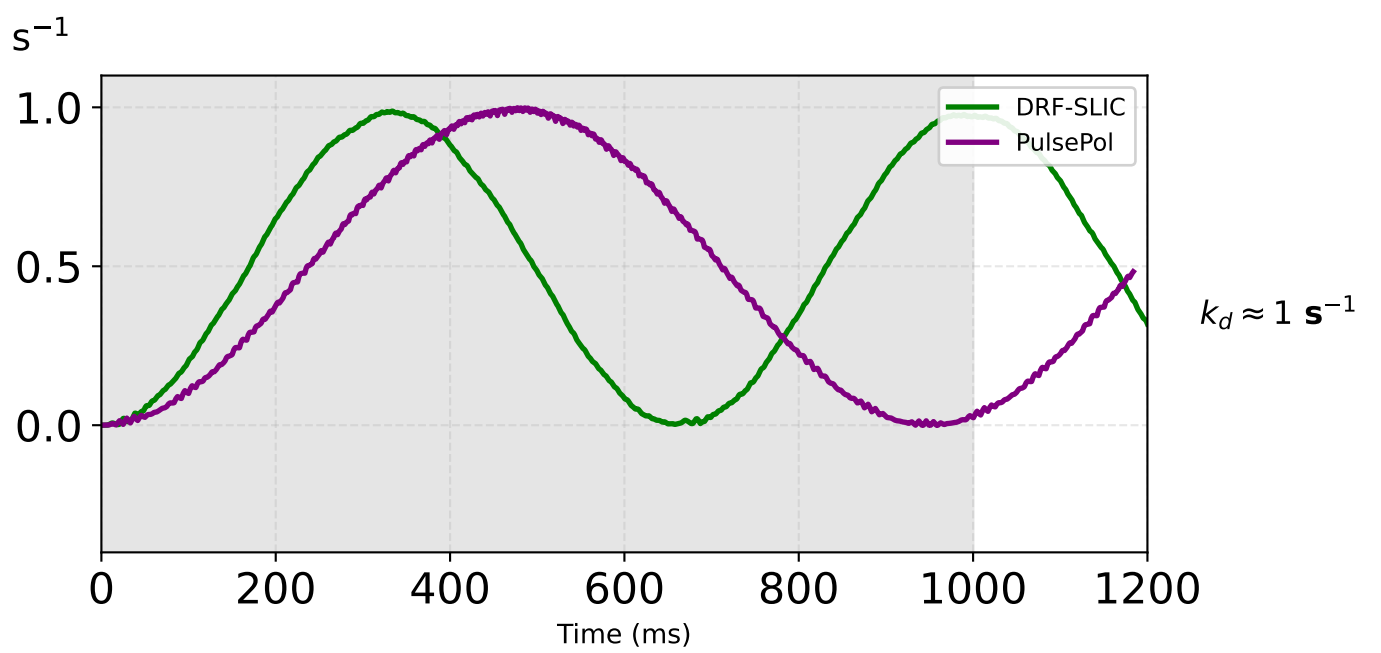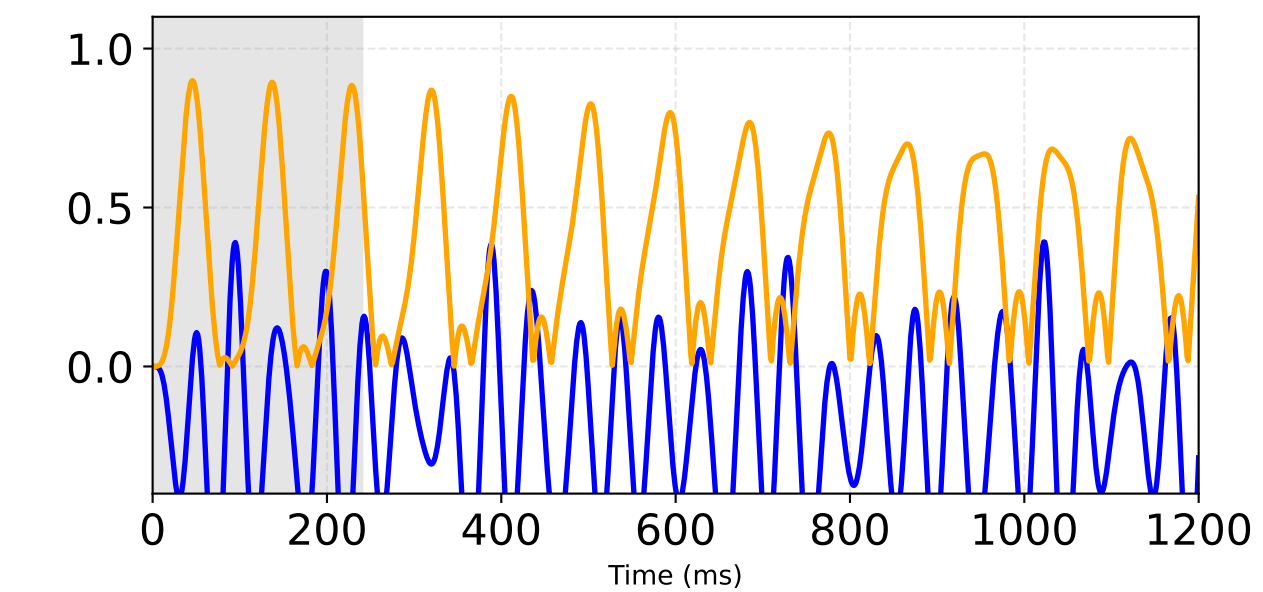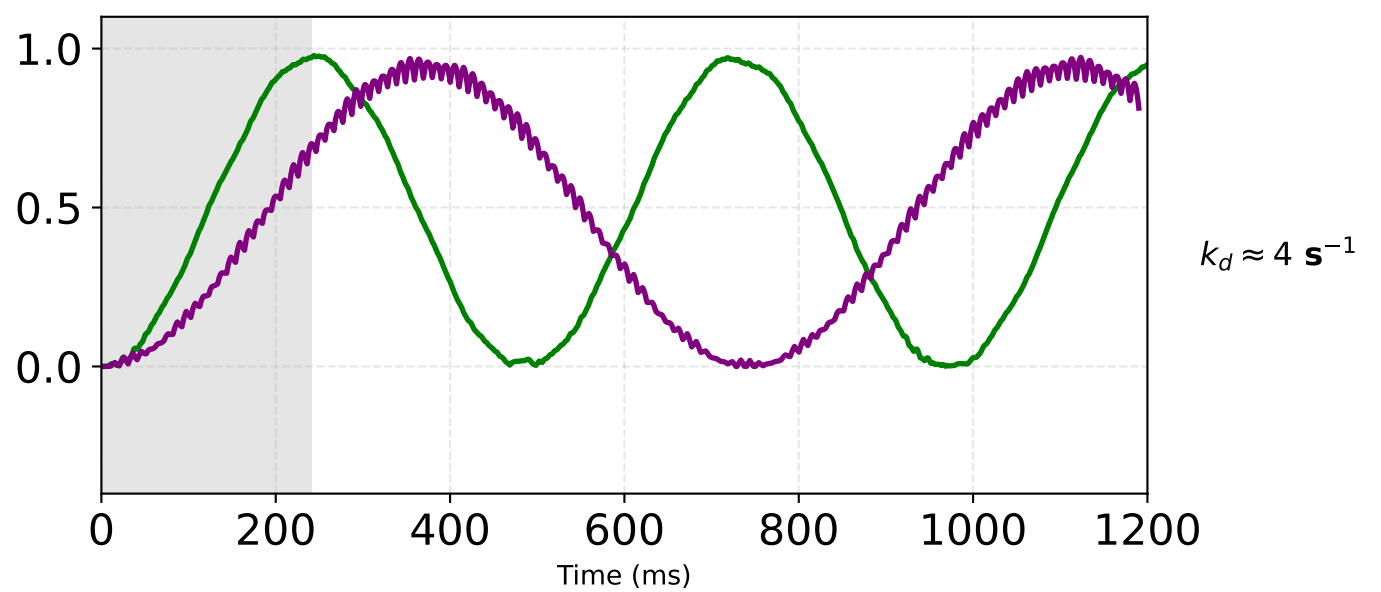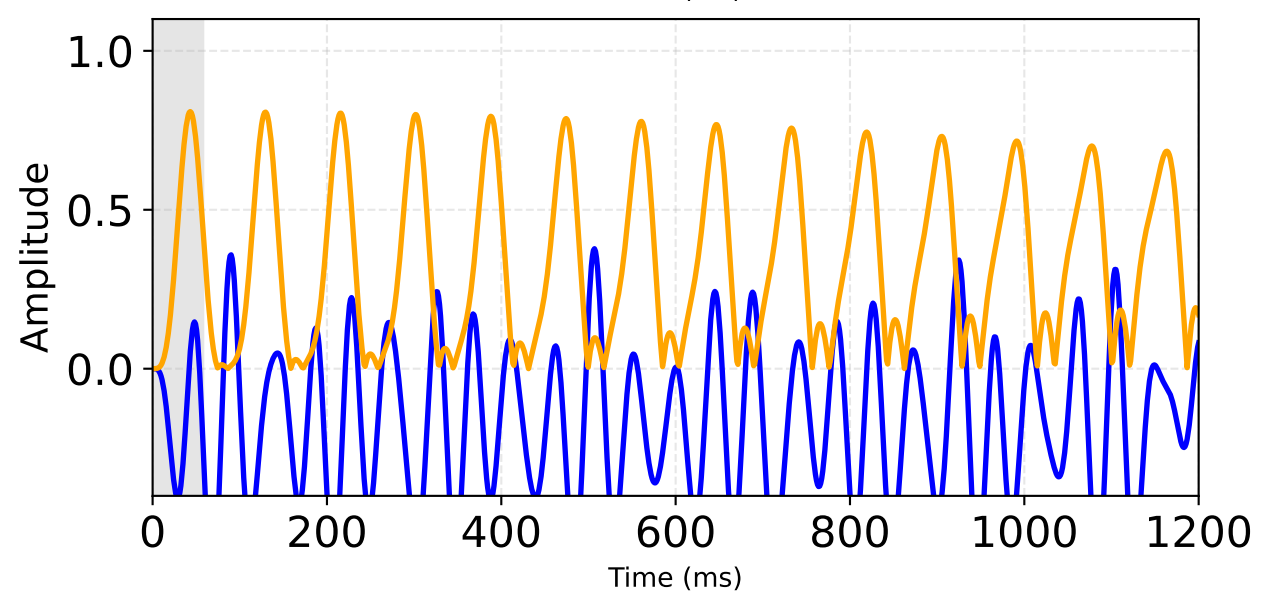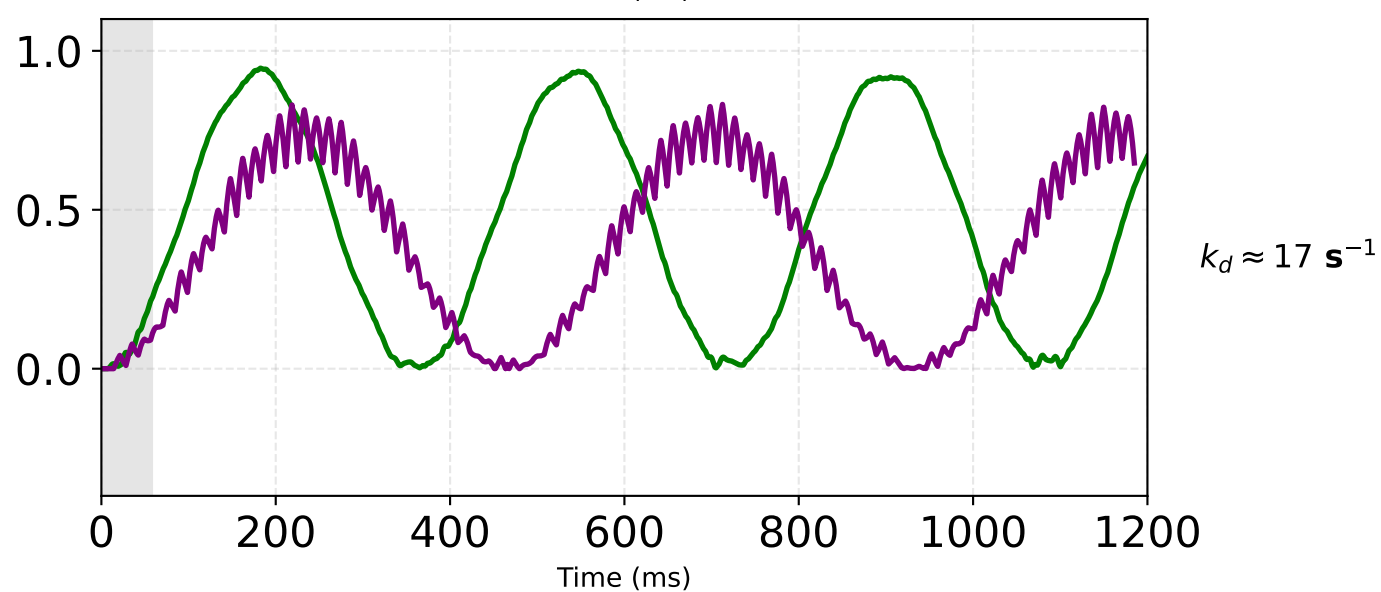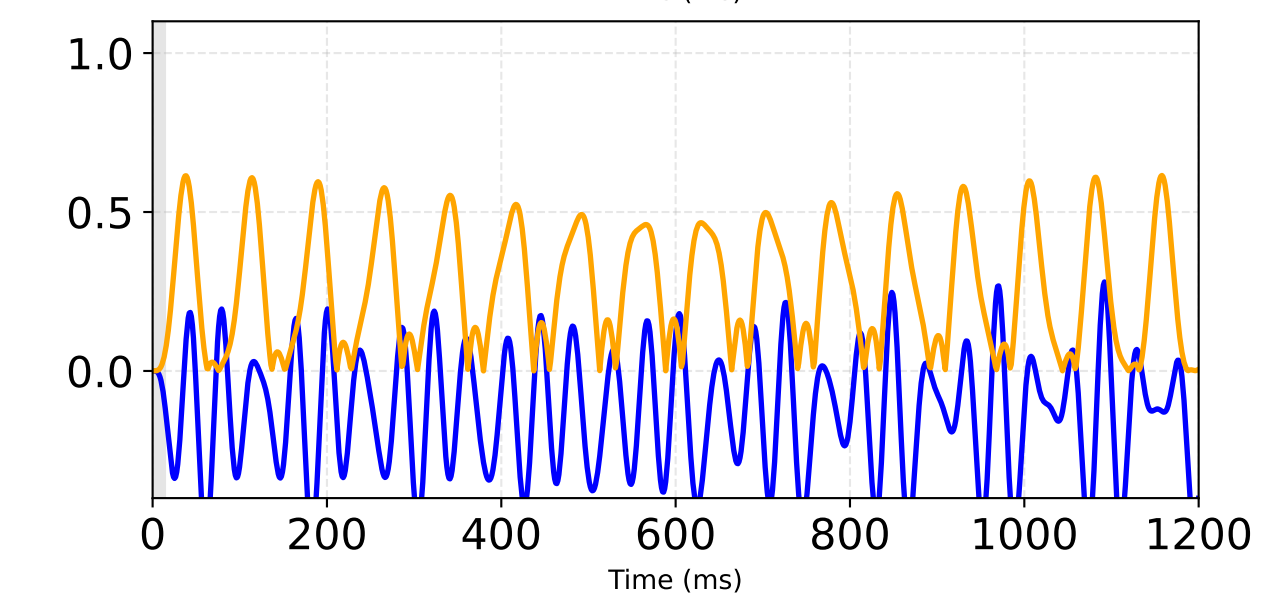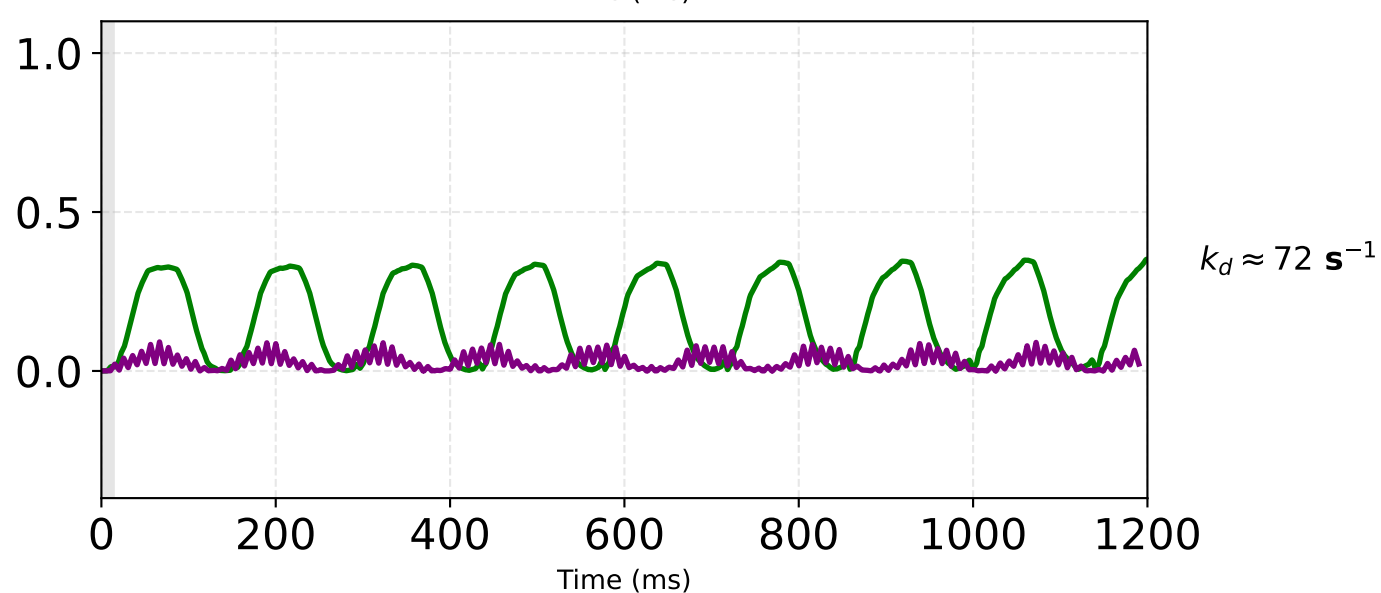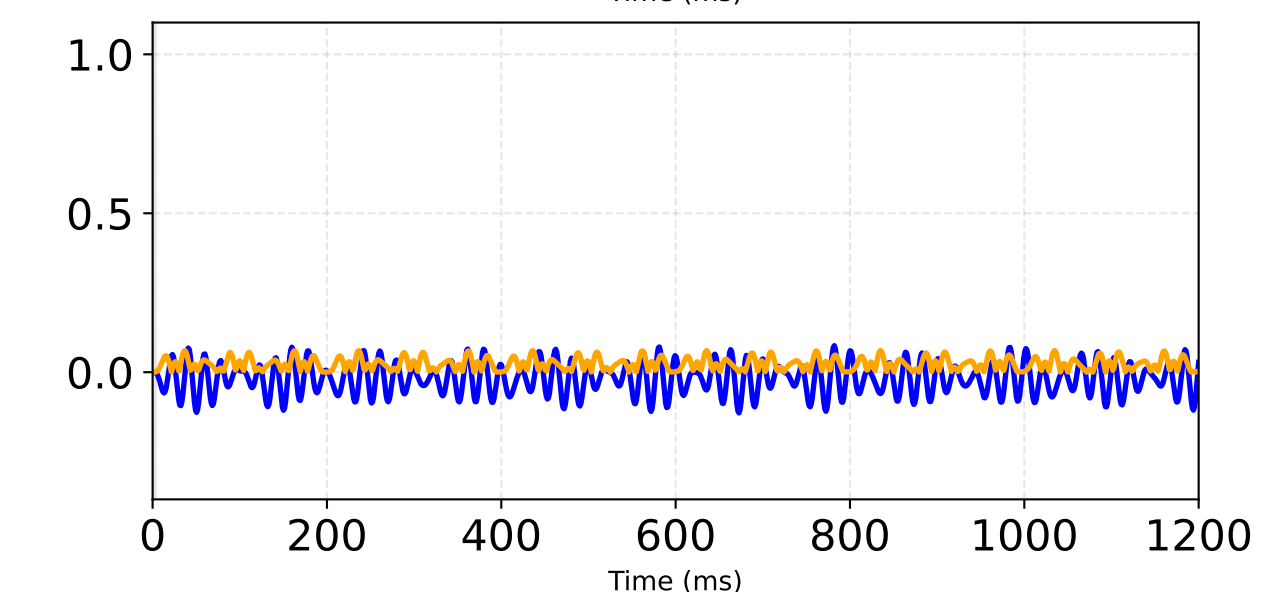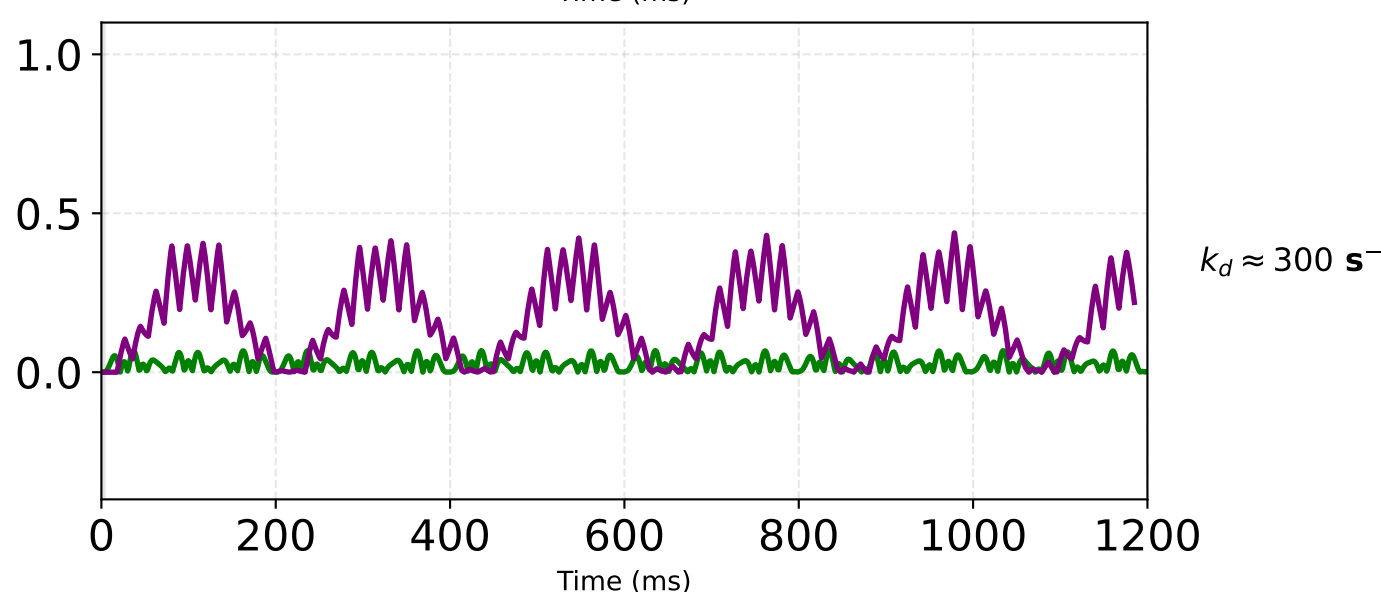

Supplement: d6cp00879h2.zip [file Combined_SABRE_Analysis_Final.pdf › SI_figures/Combined_SABRE_Analysis_Final.pdf]

# Comprehensive 2D Maps for DRF SLIC

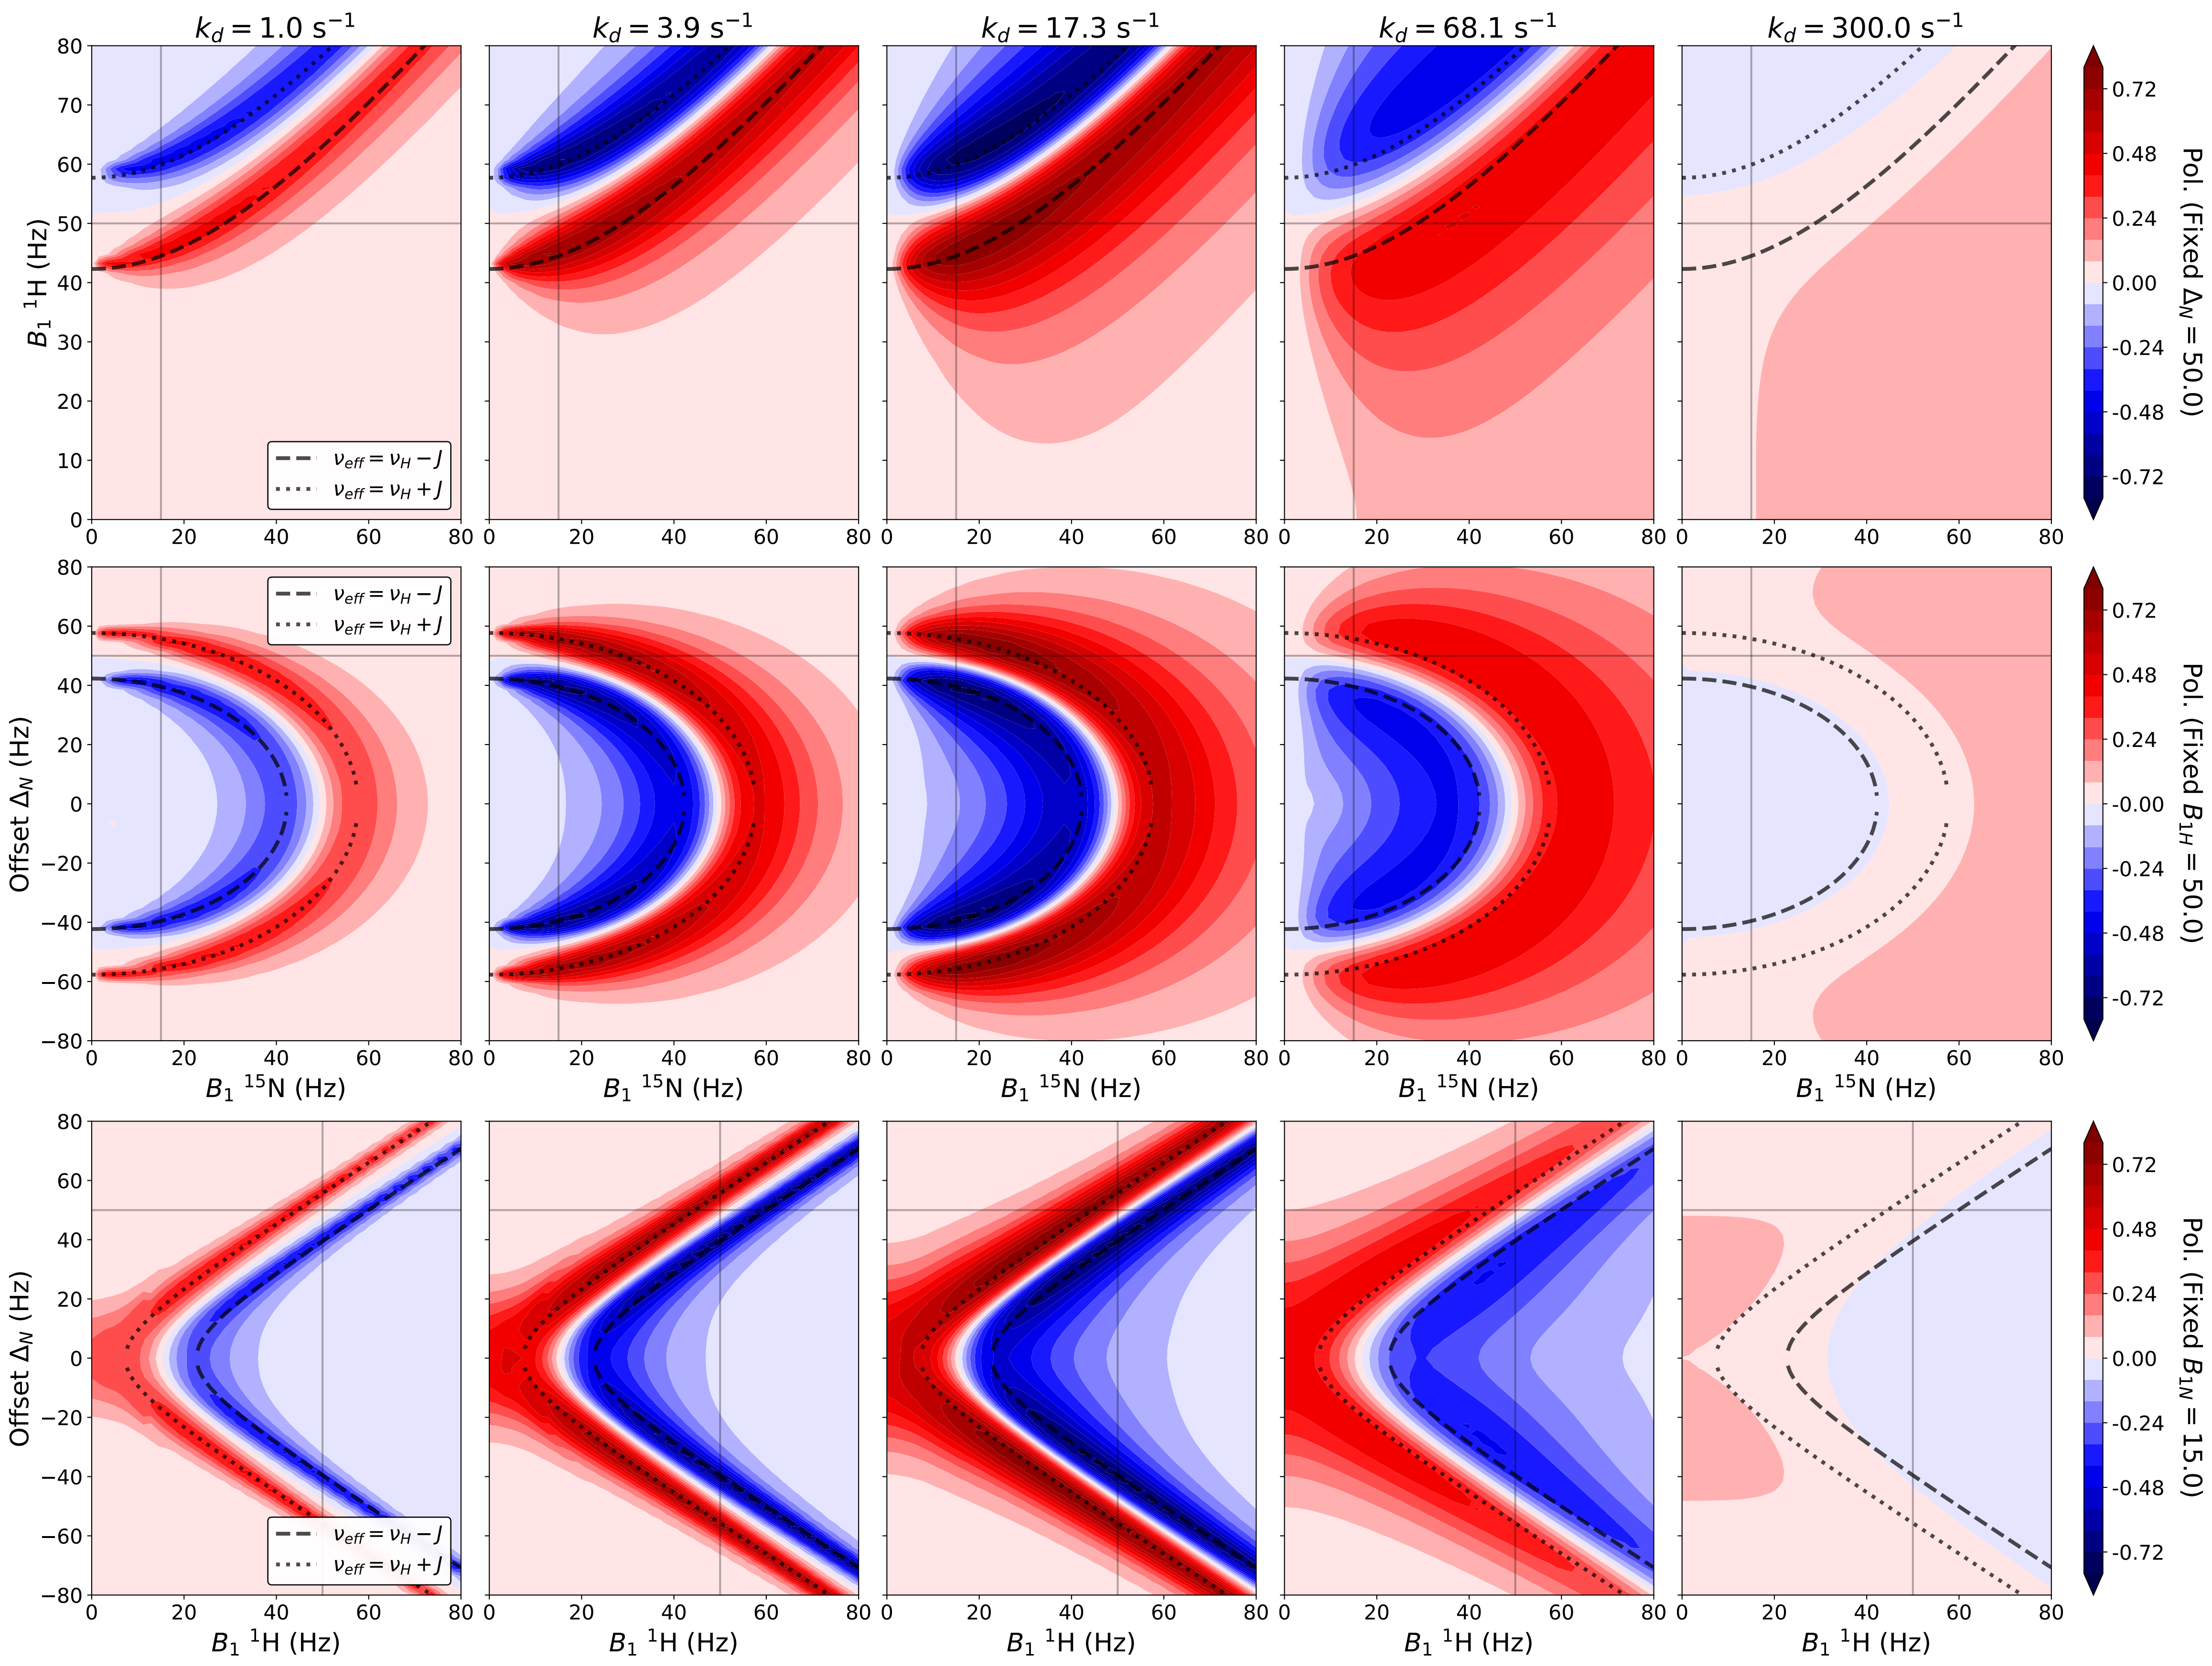

Supplement: d6cp00879h2.zip [file DRF_SLIC_NULLSPACE_Comprehensive_2D.pdf › SI_figures/DRF_SLIC_NULLSPACE_Comprehensive_2D.pdf]

# DRF SLIC best possible polarization depending on one parameter

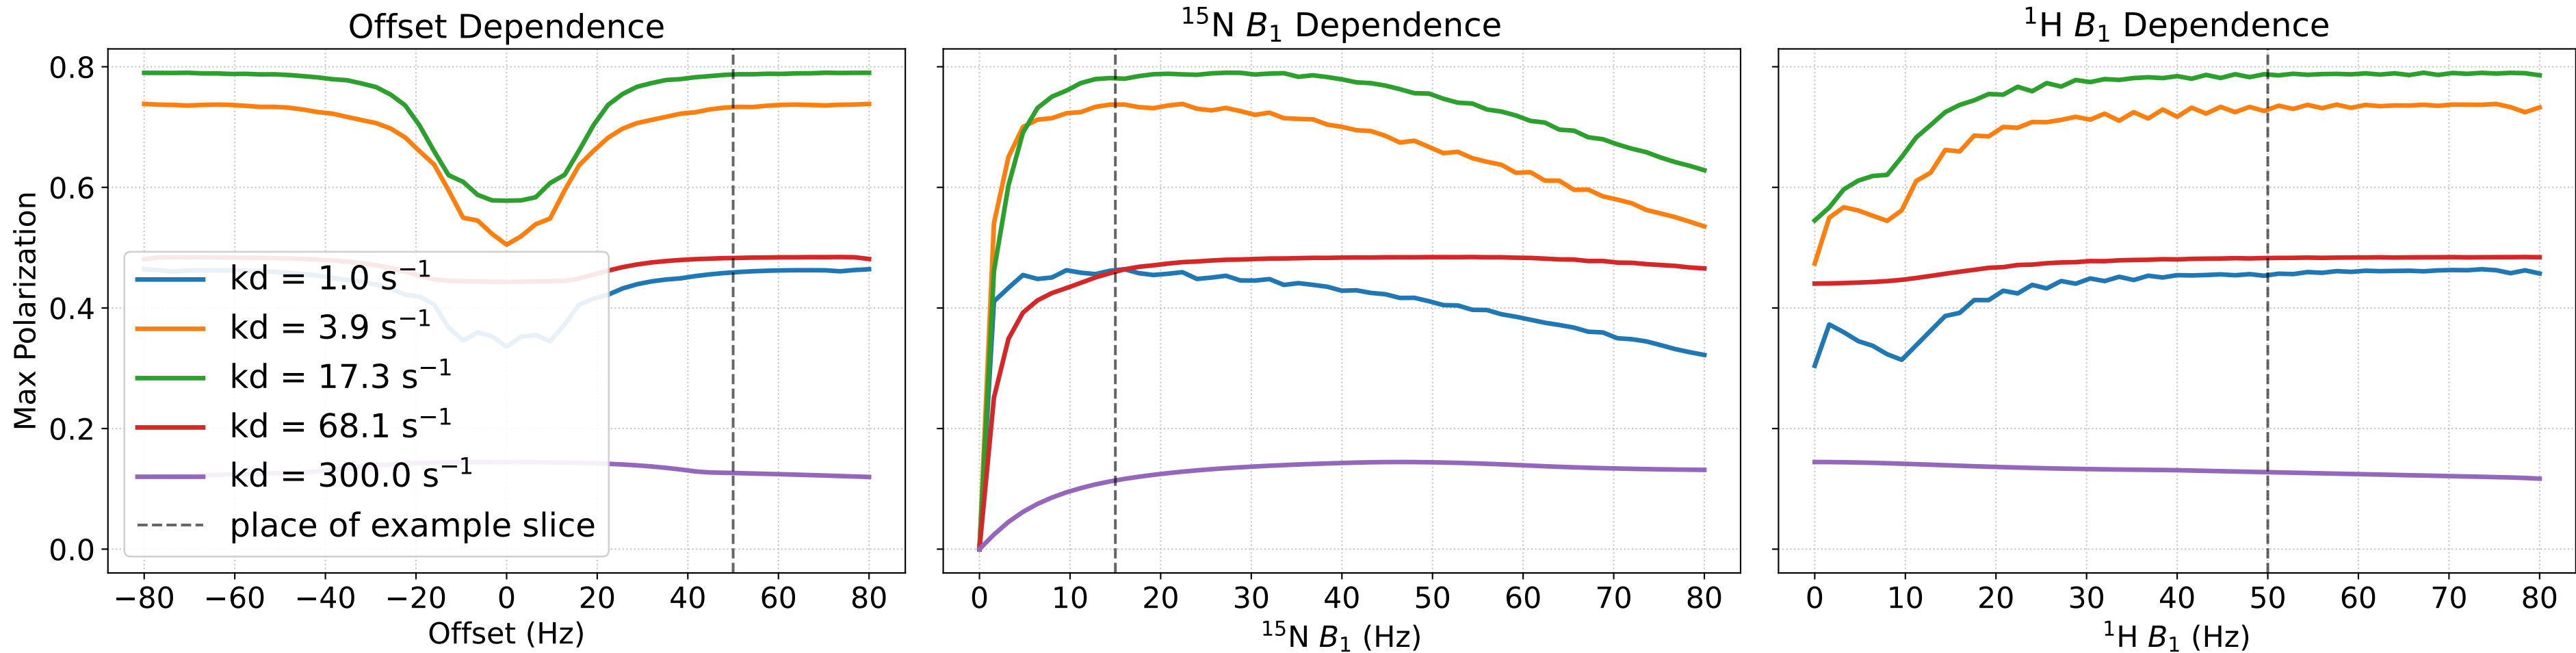

Supplement: d6cp00879h2.zip [file DRF_SLIC_best_pol_one_parameter.pdf › SI_figures/DRF_SLIC_best_pol_one_parameter.pdf]

# Phase vs. $\tau_{pp}$ Heatmaps at Different Exchange Rates ( $k_d$ )

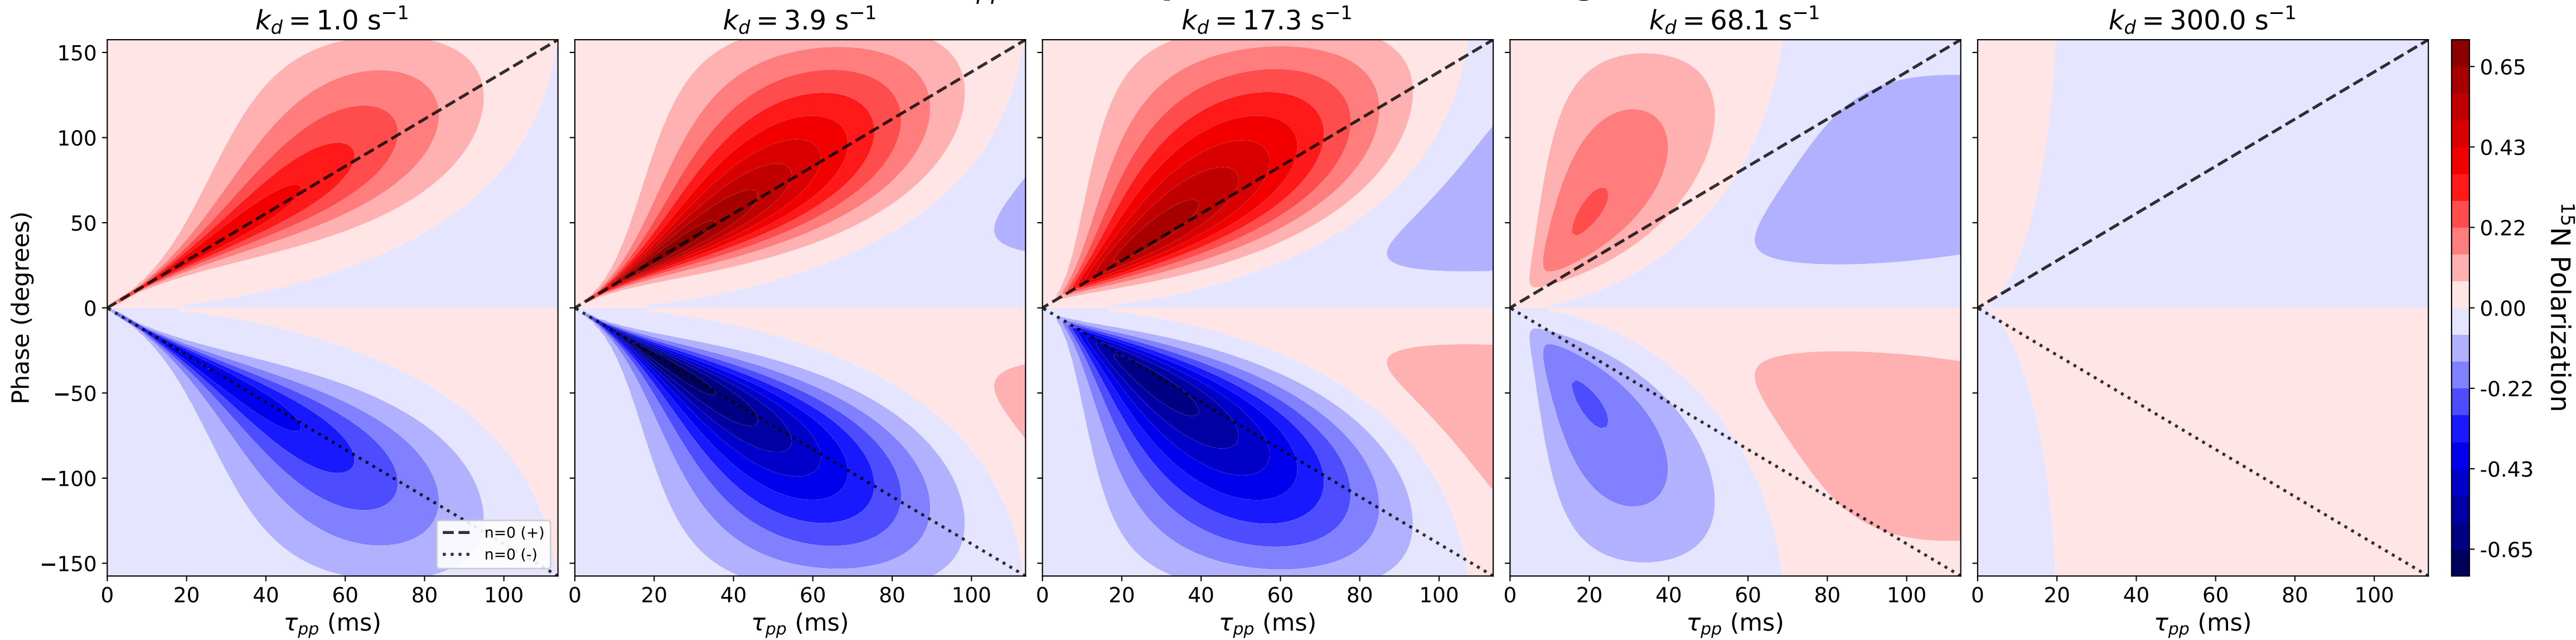

Supplement: d6cp00879h2.zip [file SABRE_PP_Phase_Tau_Heatmaps.pdf › SI_figures/SABRE_PP_Phase_Tau_Heatmaps.pdf]

# SABRE-SHEATH

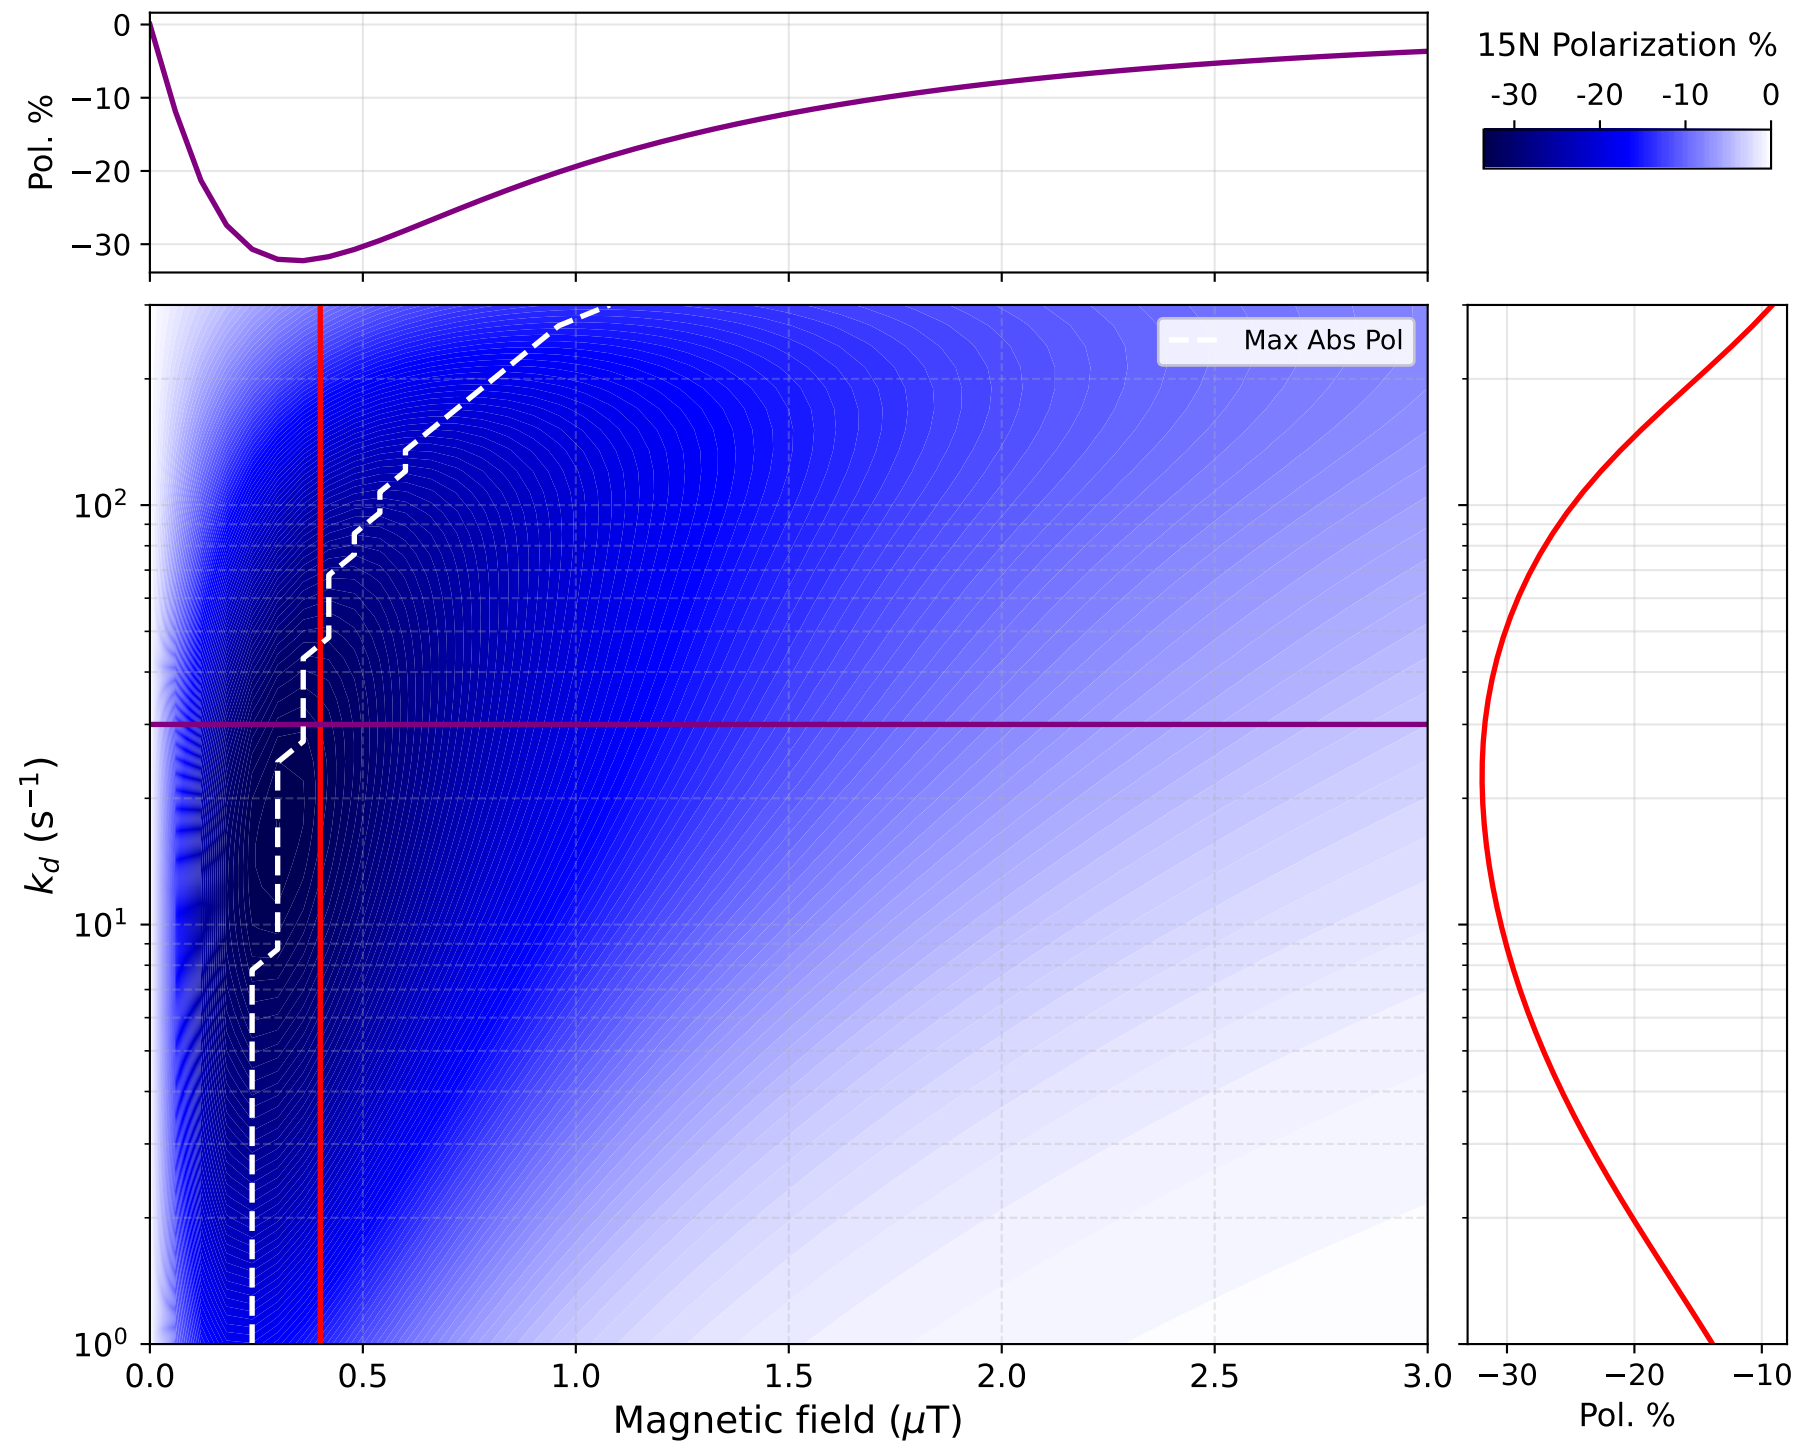

Supplement: d6cp00879h2.zip [file SABRE_SHEATH_plot.pdf › SI_figures/SABRE_SHEATH_plot.pdf]

# SABRE-SLIC

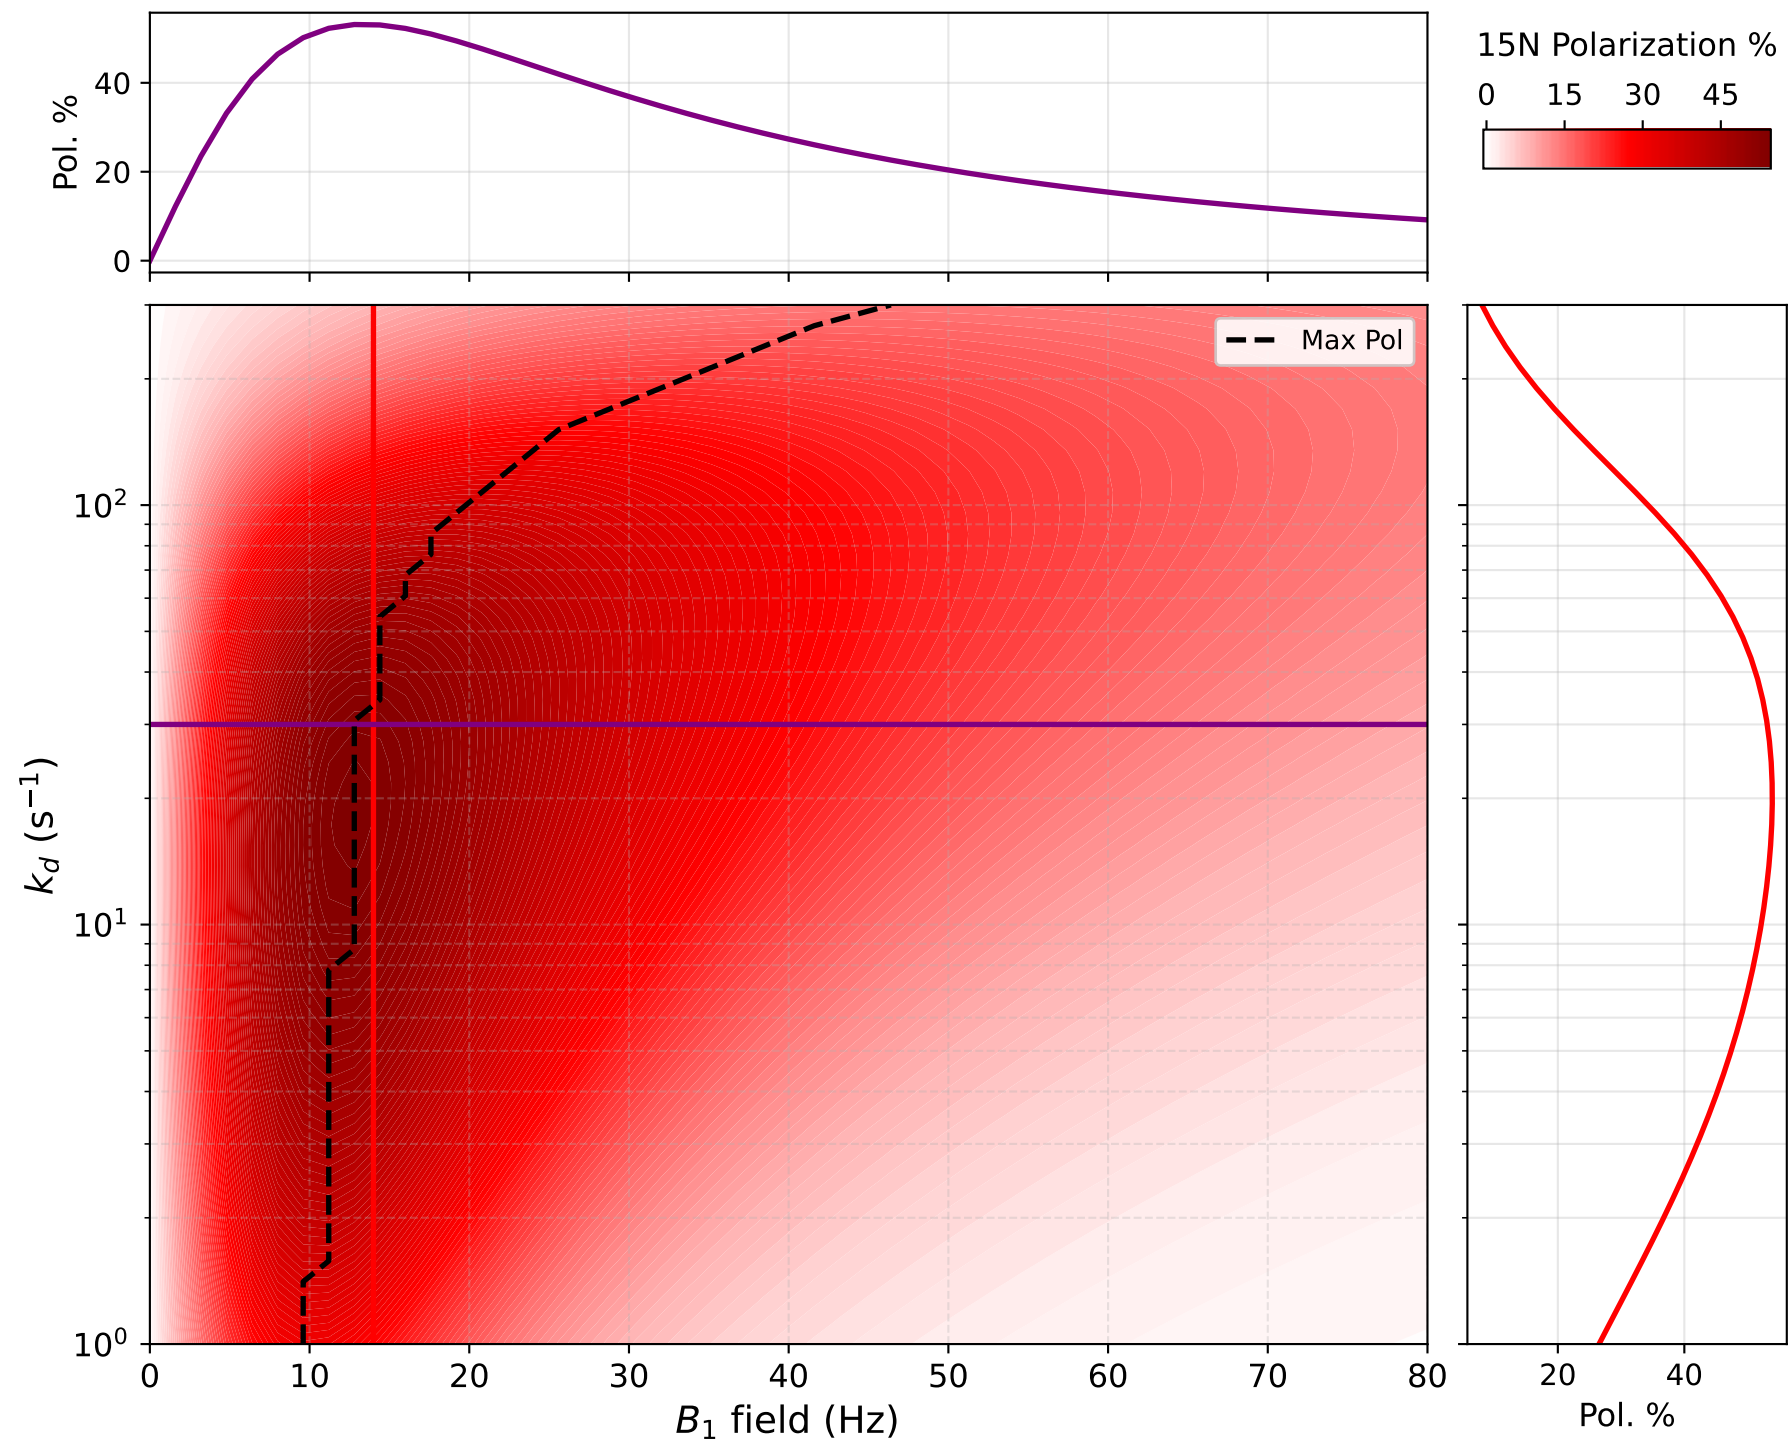

Supplement: d6cp00879h2.zip [file SLIC_NULLSPACE_plot.pdf › SI_figures/SLIC_NULLSPACE_plot.pdf]

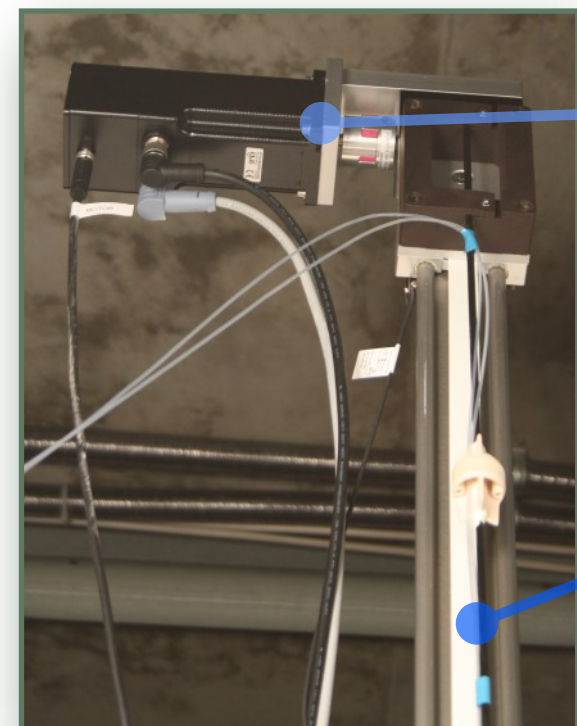

Motor

Track

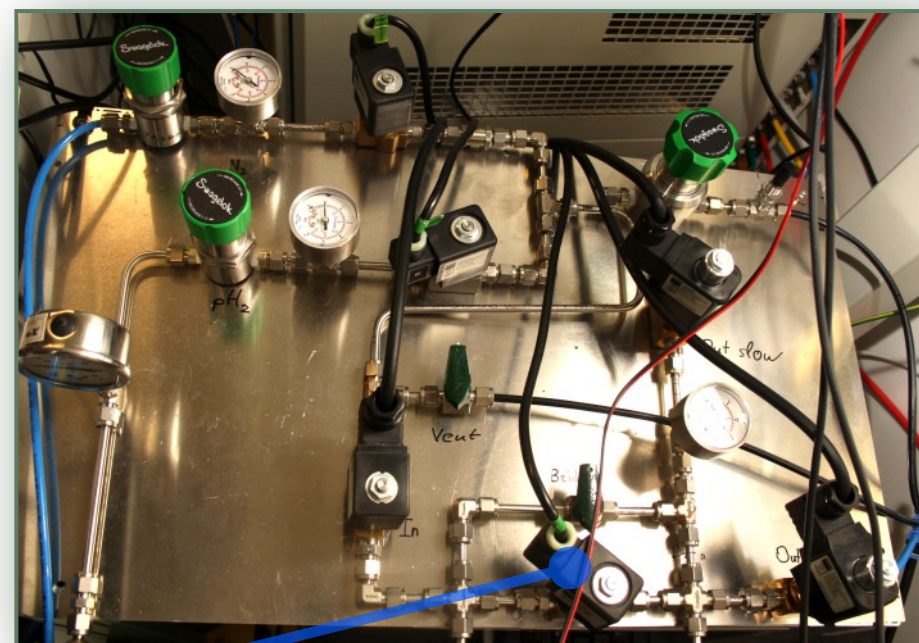

Valves

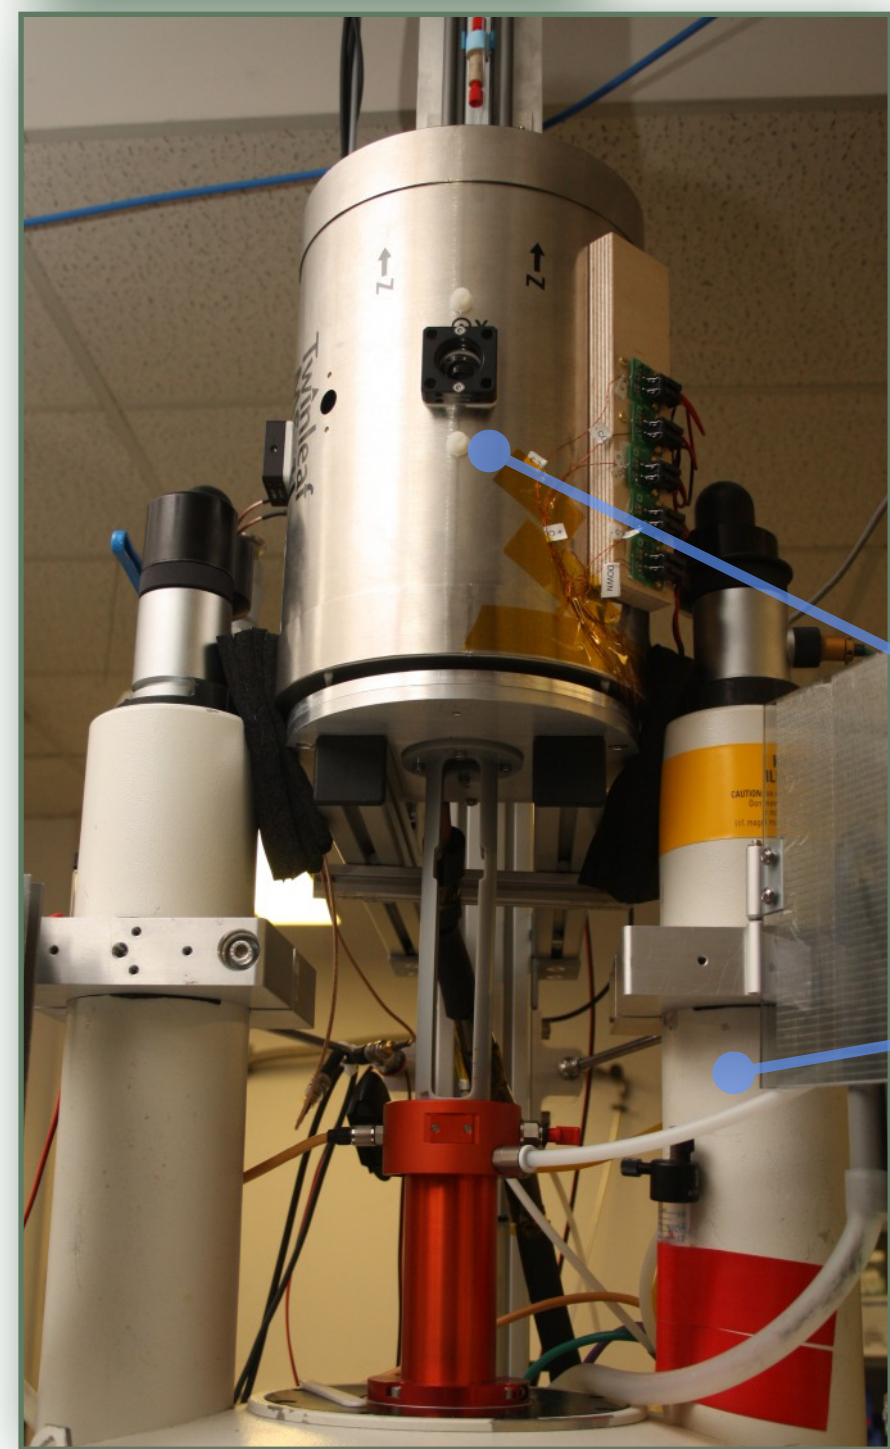

Sample

Shield

Magnet

Interface

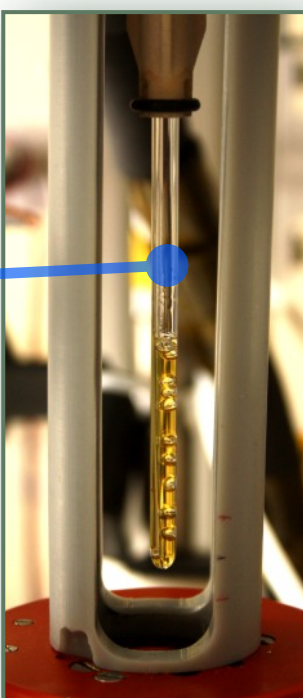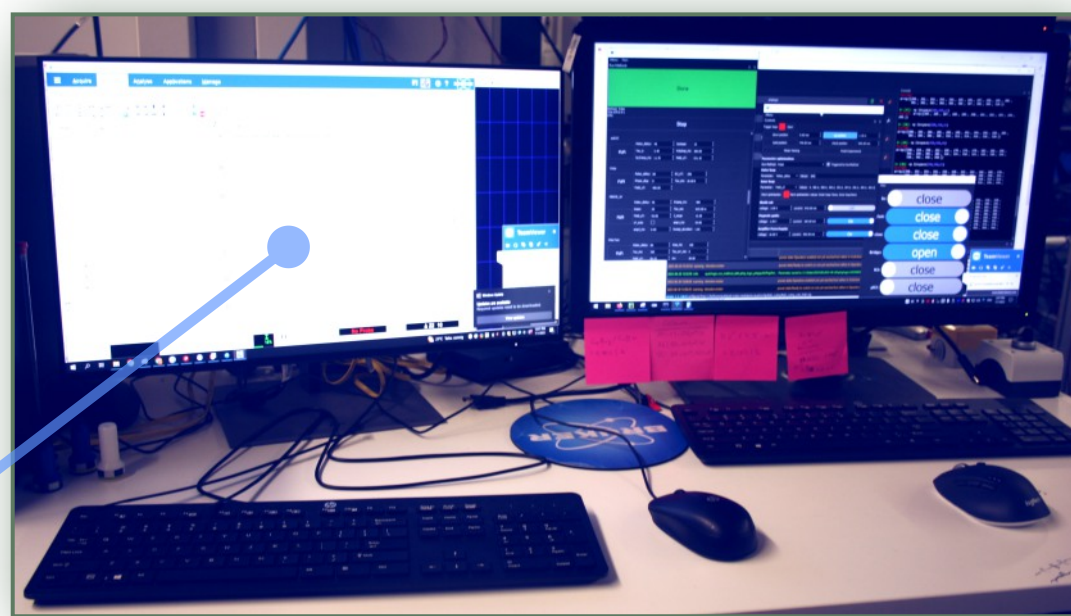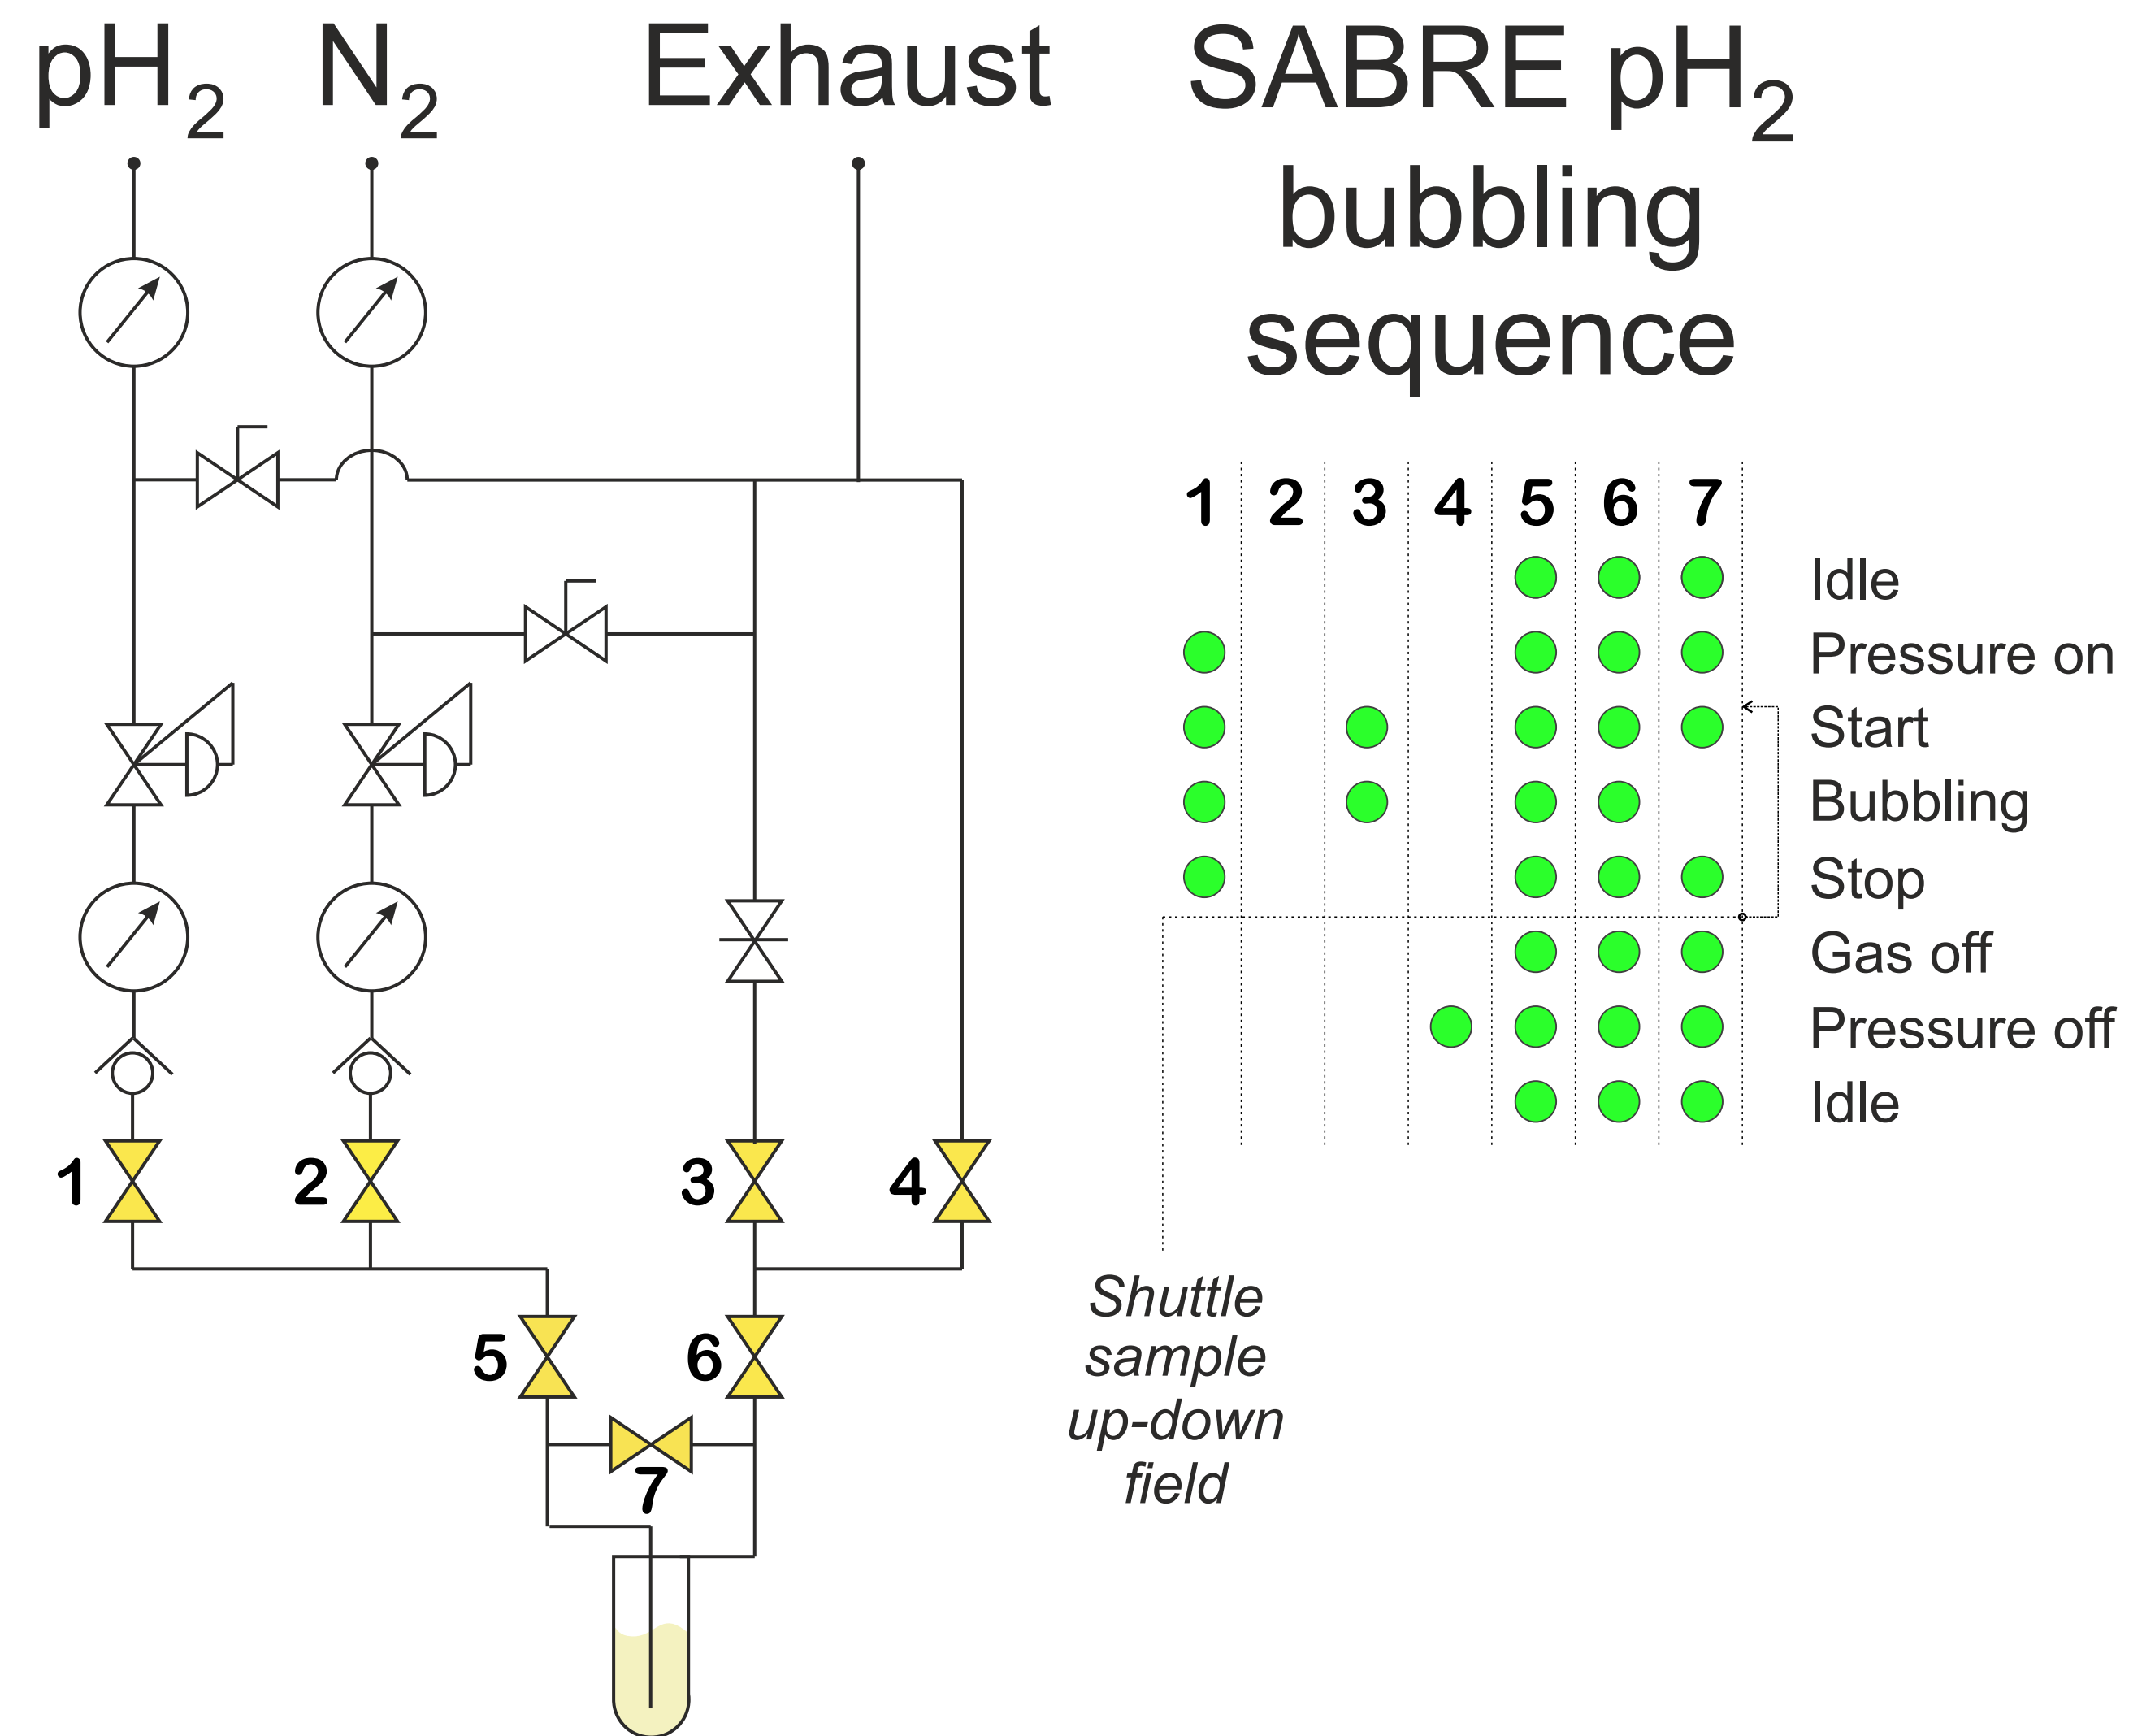

Supplement: d6cp00879h2.zip [file Setup.pdf › SI_figures/Setup.pdf]
